# Supplementary material for: Infectious Agents and Bone Marrow Failure: A Causal or a Casual Connection?
Source: Front Med (Lausanne). 2021 Nov 4;8:757730. doi: 10.3389/fmed.2021.757730 (PMC8599277; doi:10.3389/fmed.2021.757730)
Supplement: Supplementary file 4 [file Table_3.XLSX]

## Sheet: AA
								Results of the CDR3 matching
Number in Query	CDR3 sequency	Patient UPN	Oligoclonality?	V gene	J gene	NGS frequency	Reference	Dist	CDR3.beta.aa	Species	Category	Pathology	Pathology.Mesh.ID	Additional.study.details	Antigen.identification.method	Single.cell	NGS	Antigen.protein	Protein.ID	Epitope.peptide	Epitope.ID	MHC	Tissue	T.Cell.Type	T.cell.characteristics	CDR3.alpha.nt	TRAV	TRAJ	TRBV	TRBD	TRBJ	Reconstructed.J.annotation	CDR3.beta.nt	Mouse.strain	PubMed.ID	Remarks
1	CASSVRDYEQYF	AA1	YES	TRBV2	TRBJ2-7	0.215	Giudice et al., 2018	1	CASSVADYEQYF	Human	Pathogens	M.Tuberculosis	D009169	Bulk	22	No	Yes	NA	NA	NA	NA	NA	PBMC	CD4	NA	NA	NA	NA	TRBV28	NA	NA	NA	NA	NA	32341563	NA
1	CASSVRDYEQYF	AA1	YES	TRBV2	TRBJ2-7	0.215	Giudice et al., 2018	1	CASSVRDGEQYF	Human	Autoimmune	Multiple sclerosis (MS)	D009103	NA	3	No	Yes	NA	NA	NA	NA	NA	NA	CD8	NA	NA	NA	NA	TRBV11-03	NA	TRBJ2-7	No	NA	NA	26125037	NA
2	CSALPPGLASTDTQYF	AA1	YES	TRBV20-1	TRBJ2-3	0.022	Giudice et al., 2018	1	CSALPPGLVSTDTQYF	Human	Pathogens	M.Tuberculosis	D009169	Bulk	22	No	Yes	NA	NA	NA	NA	NA	PBMC	CD4	NA	NA	NA	NA	TRBV20-1	NA	NA	NA	NA	NA	32341563	NA
2	CSALPPGLASTDTQYF	AA1	YES	TRBV20-1	TRBJ2-3	0.022	Giudice et al., 2018	1	CSALPPGRASTDTQYF	Human	Pathogens	M.Tuberculosis	D009169	Bulk	22	No	Yes	NA	NA	NA	NA	NA	PBMC	CD4	NA	NA	NA	NA	TRBV20-1	NA	NA	NA	NA	NA	32341563	NA
2	CSALPPGLASTDTQYF	AA1	YES	TRBV20-1	TRBJ2-3	0.022	Giudice et al., 2018	1	CSALPPGRASTDTQYF	Human	Pathogens	M.Tuberculosis	D009169	Bulk	22	No	Yes	NA	NA	NA	NA	NA	PBMC	CD4	NA	NA	NA	NA	TRBV20-1	NA	NA	NA	NA	NA	32341563	NA
2	CSALPPGLASTDTQYF	AA1	YES	TRBV20-1	TRBJ2-3	0.022	Giudice et al., 2018	0	CSALPPGLASTDTQYF	Human	Pathogens	M.Tuberculosis	D009169	Bulk	22	No	Yes	NA	NA	NA	NA	NA	PBMC	CD4	NA	NA	NA	NA	TRBV20-1	NA	NA	NA	NA	NA	32341563	NA
5	CASSFRDWGRYEQYF	AA2	YES	TRBV7-9	TRBJ2-7	0.128	Giudice et al., 2018	1	CASSFRDRGRYEQYF	Human	Pathogens	Cytomegalovirus (CMV)	D003586	NA	1	No	Yes	pp65	P06725	TPRVTGGGAM	65748	HLA-B*07:02	PBMC	CD8	NA	NA	NA	NA	TRBV7-9	NA	TRBJ2-7	NA	NA	NA	30587531	NA
12	CATSDPLTASYEQYF	AA4	YES	TRBV24-1	TRBJ2-7	0.049	Giudice et al., 2018	1	CATSDPLTASYEQF	Human	Pathogens	Cytomegalovirus (CMV)	D003586	CMV	1	No	No	pp65	P06725	NLVPMVATV	44920	HLA-A*02:01	PBMC	CD8	NA	NA	NA	NA	TRBV15	NA	TRBJ2-1	No	NA	NA	12616496	NA
12	CATSDPLTASYEQYF	AA4	YES	TRBV24-1	TRBJ2-7	0.049	Giudice et al., 2018	1	CASDPLTASYEQYF	Human	Pathogens	Cytomegalovirus (CMV)	D003586	NA	1	No	No	pp65	P06725	NLVPMVATV	44920	HLA-A*02	PBMC	CD8	NA	NA	NA	NA	TRBV24	NA	TRBJ2-7	No	NA	NA	19542443	NA
13	CASGGANSPLHF	AA5	YES	TRBV9	TRBJ2-2	0.119	Giudice et al., 2018	1	CASGGAYNSPLHF	Human	Pathogens	M.Tuberculosis	D009169	NA	22	Yes	Yes	NA	NA	NA	NA	NA	PBMC	CD4	NA	NA	TRAV5	TRAJ40	TRBV19	NA	TRBJ1-6	NA	NA	NA	32341563	NA
19	CASSFTGELFF	AA7	NO	TRBV12-4, 12-3	TRBJ2-2	0.041	Giudice et al., 2018	1	CASSSTGELFF	Human	Autoimmune	Celiac disease	D002446	NA	22	No	Yes	NA	NA	NA	NA	NA	Gut	CD4	NA	NA	NA	NA	TRBV7-8	NA	NA	No	NA	NA	29269859	NA
19	CASSFTGELFF	AA7	NO	TRBV12-4, 12-3	TRBJ2-2	0.041	Giudice et al., 2018	1	CASSSTGELFF	Human	Pathogens	Cytomegalovirus (CMV)	D003586	NA	1	No	Yes	pp65	P06725	RPHERNGFTVL	55170	HLA-B*07:02	PBMC	CD8	NA	NA	NA	NA	TRBV7-6	NA	TRBJ2-2	NA	NA	NA	30587531	NA
19	CASSFTGELFF	AA7	NO	TRBV12-4, 12-3	TRBJ2-2	0.041	Giudice et al., 2018	1	CASSFGTGELFF	Human	Pathogens	Influenza	D009980	NA	1	No	Yes	NP177	P03466	LPRRSGAAGA	38688	HLA-B7	PBMC	CD8	NA	NA	NA	NA	TRBV7-8	NA	TRBJ2-2	No	TGTGCCAGCAGCTTCGGGACCGGGGAGCTGTTTTTT	NA	28636589	NA
19	CASSFTGELFF	AA7	NO	TRBV12-4, 12-3	TRBJ2-2	0.041	Giudice et al., 2018	1	CASSYTGELFF	Human	Pathogens	Influenza	D009980	NA	1	No	Yes	NP177	P03466	LPRRSGAAGA	38688	HLA-B7	PBMC	CD8	NA	NA	NA	NA	TRBV7-9	NA	TRBJ2-2	No	TGTGCCAGCAGTTACACCGGGGAGCTGTTTTTT	NA	28636589	NA
19	CASSFTGELFF	AA7	NO	TRBV12-4, 12-3	TRBJ2-2	0.041	Giudice et al., 2018	1	CASSLTGELFF	Human	Pathogens	M.Tuberculosis	D009169	Bulk	22	No	Yes	NA	NA	NA	NA	NA	PBMC	CD4	NA	NA	NA	NA	TRBV7-6	NA	NA	NA	NA	NA	32341563	NA
19	CASSFTGELFF	AA7	NO	TRBV12-4, 12-3	TRBJ2-2	0.041	Giudice et al., 2018	1	CASSPTGELFF	Human	Autoimmune	Psoriatic arthritis	D015535	NA	22	No	Yes	NA	NA	NA	NA	NA	Skin	NA	NA	NA	NA	NA	TRBV18	NA	NA	NA	ATCCTGAGGATCCAGCAGGTAGTGCGAGGAGATTCGGCAGCTTATTTCTGTGCCAGCTCACCGACAGGGGAGCTGTTTTTTGGAGAA	NA	28945199	NA
21	CASSLAGNYGYTF	AA7	NO	TRBV5-6	TRBJ1-2	0.03	Giudice et al., 2018	1	CASSLTGNYGYTF	Human	Cancer	Clear cell renal carcinoma	D002292	NA	3	No	No	NA	NA	NA	NA	NA	Kidney+PBMC	CD4	TIL	NA	NA	NA	NA	NA	TRBJ1-2	No	NA	NA	25637538	NA
21	CASSLAGNYGYTF	AA7	NO	TRBV5-6	TRBJ1-2	0.03	Giudice et al., 2018	1	CASSLGAGNYGYTF	Human	Pathogens	Cytomegalovirus (CMV)	D003586	Human immunodeficiency virus (HIV)	1	No	No	pp65	P06725	TPRVTGGGAM	65748	HLA-B*07:02	PBMC	CD8	NA	NA	NA	NA	TRBV27	TRBD1	TRBJ1-2	No	NA	NA	21555537	NA
21	CASSLAGNYGYTF	AA7	NO	TRBV5-6	TRBJ1-2	0.03	Giudice et al., 2018	1	CASSLQGNYGYTF	Human	Pathogens	Influenza	D009980	NA	1	No	Yes	Matrix protein (M1)	P03485	GILGFVFTL	20354	HLA-A2	PBMC	CD8	NA	NA	NA	NA	TRBV7-3	NA	TRBJ1-2	No	TGTGCCAGCAGCTTACAGGGGAACTATGGCTACACCTTC	NA	28636589	NA
21	CASSLAGNYGYTF	AA7	NO	TRBV5-6	TRBJ1-2	0.03	Giudice et al., 2018	0	CASSLAGNYGYTF	Human	Pathogens	Influenza	D009980	NA	1	No	Yes	Matrix protein (M1)	P03485	GILGFVFTL	20354	HLA-A2	PBMC	CD8	NA	NA	NA	NA	TRBV7-8	NA	TRBJ1-2	No	TGTGCCAGCAGCTTAGCGGGAAACTATGGCTACACCTTC	NA	28636589	NA
21	CASSLAGNYGYTF	AA7	NO	TRBV5-6	TRBJ1-2	0.03	Giudice et al., 2018	1	CASSLTGNYGYTF	Human	Pathogens	M.Tuberculosis	D009169	NA	22	Yes	Yes	NA	NA	NA	NA	NA	PBMC	CD4	NA	NA	TRAV8-6	TRAJ20	TRBV28	NA	TRBJ1-2	NA	NA	NA	32341563	NA
21	CASSLAGNYGYTF	AA7	NO	TRBV5-6	TRBJ1-2	0.03	Giudice et al., 2018	1	CASSLEGNYGYTF	Human	Pathogens	M.Tuberculosis	D009169	NA	22	Yes	Yes	NA	NA	NA	NA	NA	PBMC	CD4	NA	NA	mTRDV2-2	TRAJ40	TRBV5-1	NA	TRBJ1-2	NA	NA	NA	32341563	NA
21	CASSLAGNYGYTF	AA7	NO	TRBV5-6	TRBJ1-2	0.03	Giudice et al., 2018	1	CASSLEGNYGYTF	Human	Pathogens	M.Tuberculosis	D009169	NA	22	Yes	Yes	NA	NA	NA	NA	NA	PBMC	CD4	NA	NA	mTRDV2-2	TRAJ40	TRBV5-1	NA	TRBJ1-2	NA	NA	NA	32341563	NA
21	CASSLAGNYGYTF	AA7	NO	TRBV5-6	TRBJ1-2	0.03	Giudice et al., 2018	1	CASSLAGYGYTF	Human	Pathogens	M.Tuberculosis	D009169	Bulk	22	No	Yes	NA	NA	NA	NA	NA	PBMC	CD4	NA	NA	NA	NA	TRBV5-5	NA	NA	NA	NA	NA	32341563	NA
25	CSATDG~NQPQHF	AA9	NO	TRBV20-1	TRBJ1-5	0.189	Giudice et al., 2018	1	CSATDGNQPQHF	Human	Pathogens	M.Tuberculosis	D009169	NA	22	Yes	Yes	NA	NA	NA	NA	NA	PBMC	CD4	NA	NA	TRAV4	TRAJ30	TRBV20-1	NA	TRBJ1-5	NA	NA	NA	32341563	NA
26	CATSRVAGETQYF	AA9	NO	TRBV15	TRBJ2-5	0.188	Giudice et al., 2018	1	CATSRDAGETQYF	Human	Pathogens	Cytomegalovirus (CMV)	D003586	NA	1	No	Yes	UL29/28	Q6SWA3	FRCPRRFCF	741429	HLA-C*07:02	PBMC	CD8	NA	NA	NA	NA	TRBV15	NA	TRBJ2-5	NA	NA	NA	30587531	NA
26	CATSRVAGETQYF	AA9	NO	TRBV15	TRBJ2-5	0.188	Giudice et al., 2018	0	CATSRVAGETQYF	Human	Pathogens	Cytomegalovirus (CMV)	D003586	NA	1	No	Yes	UL29/28	Q6SWA3	FRCPRRFCF	741429	HLA-C*07:02	PBMC	CD8	NA	NA	NA	NA	TRBV15	NA	TRBJ2-5	NA	NA	NA	30587531	NA
26	CATSRVAGETQYF	AA9	NO	TRBV15	TRBJ2-5	0.188	Giudice et al., 2018	1	CATSRVAGEVQYF	Human	Pathogens	Cytomegalovirus (CMV)	D003586	NA	1	No	Yes	UL29/28	Q6SWA3	FRCPRRFCF	741429	HLA-C*07:02	PBMC	CD8	NA	NA	NA	NA	TRBV15	NA	TRBJ2-7	NA	NA	NA	30587531	NA
28	CASSLAGGPDTQYF	AA10	NO	TRBV7-8	TRBJ2-3	0.116	Giudice et al., 2018	1	CASSLAGGPTDTQYF	Human	Cancer	Colorectal cancer	D015179	NA	3	No	No	NA	NA	NA	NA	NA	Colon/rectum	CD8	TIL	NA	NA	NA	TRBV7-02	NA	TRBJ2-3	No	NA	NA	23771160	NA
28	CASSLAGGPDTQYF	AA10	NO	TRBV7-8	TRBJ2-3	0.116	Giudice et al., 2018	1	CASSLAGGTDTQYF	Human	Pathogens	M. tuberculosis	D009169	NA	22	Yes	Yes	NA	NA	NA	NA	NA	PBMC	CD8	NA	NA	NA	TRAJ29	TRBV6-4	NA	TRBJ2-3	NA	NA	NA	30992377	NA
28	CASSLAGGPDTQYF	AA10	NO	TRBV7-8	TRBJ2-3	0.116	Giudice et al., 2018	1	CASSGLAGGPDTQYF	Human	Pathogens	M. tuberculosis	D009169	NA	22	Yes	Yes	NA	NA	NA	NA	NA	PBMC	CD8	NA	NA	NA	TRAJ12	TRBV6-1	TRBD2	TRBJ2-3	NA	NA	NA	30992377	NA
28	CASSLAGGPDTQYF	AA10	NO	TRBV7-8	TRBJ2-3	0.116	Giudice et al., 2018	1	CASSGLAGGPDTQYF	Human	Pathogens	M. tuberculosis	D009169	NA	22	Yes	Yes	NA	NA	NA	NA	NA	PBMC	CD8	NA	NA	NA	TRAJ12	TRBV6-1	TRBD2	TRBJ2-3	NA	NA	NA	30992377	NA
28	CASSLAGGPDTQYF	AA10	NO	TRBV7-8	TRBJ2-3	0.116	Giudice et al., 2018	1	CASSGLAGGPDTQYF	Human	Pathogens	M. tuberculosis	D009169	NA	22	Yes	Yes	NA	NA	NA	NA	NA	PBMC	CD8	NA	NA	NA	TRAJ22	TRBV6-1	TRBD2	TRBJ2-3	NA	NA	NA	30992377	NA
28	CASSLAGGPDTQYF	AA10	NO	TRBV7-8	TRBJ2-3	0.116	Giudice et al., 2018	1	CASSLATGGPDTQYF	Human	Pathogens	M. tuberculosis	D009169	NA	22	Yes	Yes	NA	NA	NA	NA	NA	PBMC	CD8	NA	NA	NA	TRAJ31	TRBV12-3	NA	TRBJ2-3	NA	NA	NA	30992377	NA
28	CASSLAGGPDTQYF	AA10	NO	TRBV7-8	TRBJ2-3	0.116	Giudice et al., 2018	1	CASSELAGGPDTQYF	Human	Pathogens	M. tuberculosis	D009169	NA	22	Yes	Yes	NA	NA	NA	NA	NA	PBMC	CD8	NA	NA	NA	TRAJ12	TRBV6-1	NA	TRBJ2-3	NA	NA	NA	30992377	NA
28	CASSLAGGPDTQYF	AA10	NO	TRBV7-8	TRBJ2-3	0.116	Giudice et al., 2018	1	CASSLAGSPDTQYF	Human	Pathogens	M.Tuberculosis	D009169	NA	22	Yes	Yes	NA	NA	NA	NA	NA	PBMC	CD4	NA	NA	mTRDV2-2	TRAJ56	TRBV5-1	NA	TRBJ2-3	NA	NA	NA	32341563	NA
28	CASSLAGGPDTQYF	AA10	NO	TRBV7-8	TRBJ2-3	0.116	Giudice et al., 2018	1	CASSVAGGPDTQYF	Human	Pathogens	M.Tuberculosis	D009169	NA	22	Yes	Yes	NA	NA	NA	NA	NA	PBMC	CD4	NA	NA	TRAV3	TRAJ8	TRBV6-4	NA	TRBJ2-3	NA	NA	NA	32341563	NA
29	CASGDGGTDTQYF	AA10	NO	TRBV2	TRBJ2-3	0.083	Giudice et al., 2018	1	CASGDGSTDTQYF	Human	Pathogens	M.Tuberculosis	D009169	NA	22	Yes	Yes	NA	NA	NA	NA	NA	PBMC	CD4	NA	NA	TRAV16	TRAJ57	TRBV2	NA	TRBJ2-3	NA	NA	NA	32341563	NA
29	CASGDGGTDTQYF	AA10	NO	TRBV2	TRBJ2-3	0.083	Giudice et al., 2018	1	CASGDGSTDTQYF	Human	Pathogens	M.Tuberculosis	D009169	NA	22	Yes	Yes	NA	NA	NA	NA	NA	PBMC	CD4	NA	NA	TRAV16	TRAJ57	TRBV2	NA	TRBJ2-3	NA	NA	NA	32341563	NA
1	CASSLDLTGNTEAFF	AA10	NO	TRBV11-3	TRBJ1-1	0.042	Giudice et al., 2018	1	CASSLLTGNTEAFF	Human	Pathogens	Influenza	D009980	NA	1	No	Yes	NP177	P03466	LPRRSGAAGA	38688	HLA-B7	PBMC	CD8	NA	NA	NA	NA	TRBV7-8	NA	TRBJ1-1	No	TGTGCCAGCAGCCTCCTGACAGGGAACACTGAAGCTTTCTTT	NA	28636589	NA
7	CASSPRQGVDEQYF	AA12	NO	TRBV3-1	TRBJ2-7	0.01	Giudice et al., 2018	1	CASSPRQGNDEQYF	Human	Pathogens	Yellow fever virus	D015005	NA	1	Yes	Yes	YFV-17D	P03314	LLWNGPMAV	121572	HLA-A*02:01	NA	CD8	NA	NA	TRAV12-2	TRAJ29	TRBV12-04	TRBD1	TRBJ2-7	No	NA	NA	28103239	NA
7	CASSPRQGVDEQYF	AA12	NO	TRBV3-1	TRBJ2-7	0.01	Giudice et al., 2018	1	CASSPRQGNDEQYF	Human	Pathogens	Yellow fever virus	D015005	NA	1	Yes	Yes	YFV-17D	P03314	LLWNGPMAV	121572	HLA-A*02:01	NA	CD8	NA	NA	TRAV12-2	TRAJ29	TRBV12-03	TRBD1	TRBJ2-7	No	NA	NA	28103239	NA

## Sheet: PNH
							Results of the CDR3 matching
Number in Query	Query	Patient UPN	V gene	J gene	Reference	Dist	CDR3.alpha.aa	CDR3.beta.aa	Species	Category	Pathology	Pathology.Mesh.ID	Additional.study.details	Antigen.identification.method	Single.cell	NGS	Antigen.protein	Protein.ID	Epitope.peptide	Epitope.ID	MHC	Tissue	T.Cell.Type	T.cell.characteristics	CDR3.alpha.nt	TRAV	TRAJ	TRBV	TRBD	TRBJ	Reconstructed.J.annotation	CDR3.beta.nt	Mouse.strain	PubMed.ID	Remarks
5	CATSRVAGETQYF	PNH5/7/9/14	TRBV15	TRBJ2-5	Gargiulo et al., 2007	1	NA	CATSRDAGETQYF	Human	Pathogens	Cytomegalovirus (CMV)	D003586	NA	1	No	Yes	UL29/28	Q6SWA3	FRCPRRFCF	741429	HLA-C*07:02	PBMC	CD8	NA	NA	NA	NA	TRBV15	NA	TRBJ2-5	NA	NA	NA	30587531	NA
5	CATSRVAGETQYF	PNH5/7/9/14	TRBV15	TRBJ2-5	Gargiulo et al., 2007	0	NA	CATSRVAGETQYF	Human	Pathogens	Cytomegalovirus (CMV)	D003586	NA	1	No	Yes	UL29/28	Q6SWA3	FRCPRRFCF	741429	HLA-C*07:02	PBMC	CD8	NA	NA	NA	NA	TRBV15	NA	TRBJ2-5	NA	NA	NA	30587531	NA
5	CATSRVAGETQYF	PNH5/7/9/14	TRBV15	TRBJ2-5	Gargiulo et al., 2007	1	NA	CATSRVAGEVQYF	Human	Pathogens	Cytomegalovirus (CMV)	D003586	NA	1	No	Yes	UL29/28	Q6SWA3	FRCPRRFCF	741429	HLA-C*07:02	PBMC	CD8	NA	NA	NA	NA	TRBV15	NA	TRBJ2-7	NA	NA	NA	30587531	NA
6	CATSRIGGETQYF	PNH9	TRBV15	TRJB2-5	Gargiulo et al., 2007	1	NA	CATSRTGGETQYF	Human	Pathogens	Cytomegalovirus (CMV)	D003586	NA	1	No	Yes	UL29/28	Q6SWA3	FRCPRRFCF	741429	HLA-C*07:02	PBMC	CD8	NA	NA	NA	NA	TRBV15	NA	TRBJ2-5	NA	NA	NA	30587531	NA
6	CATSRIGGETQYF	PNH9	TRBV15	TRJB2-5	Gargiulo et al., 2007	1	NA	CATSREGGETQYF	Human	Pathogens	Cytomegalovirus (CMV)	D003586	NA	1	No	Yes	UL29/28	Q6SWA3	FRCPRRFCF	741429	HLA-C*07:02	PBMC	CD8	NA	NA	NA	NA	TRBV15	NA	TRBJ2-5	NA	NA	NA	30587531	NA
6	CATSRIGGETQYF	PNH9	TRBV15	TRJB2-5	Gargiulo et al., 2007	1	NA	CATSRDGGETQYF	Human	Pathogens	Cytomegalovirus (CMV)	D003586	NA	1	No	Yes	UL29/28	Q6SWA3	FRCPRRFCF	741429	HLA-C*07:02	PBMC	CD8	NA	NA	NA	NA	TRBV15	NA	TRBJ2-5	NA	NA	NA	30587531	NA
7	CATSRTAGETQYF	PNH2	TRBV15	TRBJ2-5	Gargiulo et al., 2007	1	NA	CATSRTGGETQYF	Human	Pathogens	Cytomegalovirus (CMV)	D003586	NA	1	No	Yes	UL29/28	Q6SWA3	FRCPRRFCF	741429	HLA-C*07:02	PBMC	CD8	NA	NA	NA	NA	TRBV15	NA	TRBJ2-5	NA	NA	NA	30587531	NA
7	CATSRTAGETQYF	PNH2	TRBV15	TRBJ2-5	Gargiulo et al., 2007	1	NA	CATSGTAGETQYF	Human	Pathogens	Cytomegalovirus (CMV)	D003586	NA	1	No	Yes	UL29/28	Q6SWA3	FRCPRRFCF	741429	HLA-C*07:02	PBMC	CD8	NA	NA	NA	NA	TRBV15	NA	TRBJ2-5	NA	NA	NA	30587531	NA
7	CATSRTAGETQYF	PNH2	TRBV15	TRBJ2-5	Gargiulo et al., 2007	1	NA	CATSRDAGETQYF	Human	Pathogens	Cytomegalovirus (CMV)	D003586	NA	1	No	Yes	UL29/28	Q6SWA3	FRCPRRFCF	741429	HLA-C*07:02	PBMC	CD8	NA	NA	NA	NA	TRBV15	NA	TRBJ2-5	NA	NA	NA	30587531	NA
7	CATSRTAGETQYF	PNH2	TRBV15	TRBJ2-5	Gargiulo et al., 2007	1	NA	CATSRVAGETQYF	Human	Pathogens	Cytomegalovirus (CMV)	D003586	NA	1	No	Yes	UL29/28	Q6SWA3	FRCPRRFCF	741429	HLA-C*07:02	PBMC	CD8	NA	NA	NA	NA	TRBV15	NA	TRBJ2-5	NA	NA	NA	30587531	NA
8	CATSRTGGETQYF	PNH9/20	TRBV15	TRBJ2-5	Gargiulo et al., 2007	0	NA	CATSRTGGETQYF	Human	Pathogens	Cytomegalovirus (CMV)	D003586	NA	1	No	Yes	UL29/28	Q6SWA3	FRCPRRFCF	741429	HLA-C*07:02	PBMC	CD8	NA	NA	NA	NA	TRBV15	NA	TRBJ2-5	NA	NA	NA	30587531	NA
8	CATSRTGGETQYF	PNH9/20	TRBV15	TRBJ2-5	Gargiulo et al., 2007	1	NA	CATSREGGETQYF	Human	Pathogens	Cytomegalovirus (CMV)	D003586	NA	1	No	Yes	UL29/28	Q6SWA3	FRCPRRFCF	741429	HLA-C*07:02	PBMC	CD8	NA	NA	NA	NA	TRBV15	NA	TRBJ2-5	NA	NA	NA	30587531	NA
8	CATSRTGGETQYF	PNH9/20	TRBV15	TRBJ2-5	Gargiulo et al., 2007	1	NA	CATSRDGGETQYF	Human	Pathogens	Cytomegalovirus (CMV)	D003586	NA	1	No	Yes	UL29/28	Q6SWA3	FRCPRRFCF	741429	HLA-C*07:02	PBMC	CD8	NA	NA	NA	NA	TRBV15	NA	TRBJ2-5	NA	NA	NA	30587531	NA
8	CATSRTGGETQYF	PNH9/20	TRBV15	TRBJ2-5	Gargiulo et al., 2007	1	NA	CATSVTGGETQYF	Human	Pathogens	Cytomegalovirus (CMV)	D003586	NA	1	No	Yes	UL29/28	Q6SWA3	FRCPRRFCF	741429	HLA-C*07:02	PBMC	CD8	NA	NA	NA	NA	TRBV15	NA	TRBJ2-5	NA	NA	NA	30587531	NA
9	CATSRIAGETQYF	PNH5/16	TRBV15	TRJB2-5	Gargiulo et al., 2007	1	NA	CATSNIAGETQYF	Human	Pathogens	Cytomegalovirus (CMV)	D003586	NA	1	No	Yes	UL29/28	Q6SWA3	FRCPRRFCF	741429	HLA-C*07:02	PBMC	CD8	NA	NA	NA	NA	TRBV15	NA	TRBJ2-5	NA	NA	NA	30587531	NA
9	CATSRIAGETQYF	PNH5/16	TRBV15	TRJB2-5	Gargiulo et al., 2007	1	NA	CATSRDAGETQYF	Human	Pathogens	Cytomegalovirus (CMV)	D003586	NA	1	No	Yes	UL29/28	Q6SWA3	FRCPRRFCF	741429	HLA-C*07:02	PBMC	CD8	NA	NA	NA	NA	TRBV15	NA	TRBJ2-5	NA	NA	NA	30587531	NA
9	CATSRIAGETQYF	PNH5/16	TRBV15	TRJB2-5	Gargiulo et al., 2007	1	NA	CATSRVAGETQYF	Human	Pathogens	Cytomegalovirus (CMV)	D003586	NA	1	No	Yes	UL29/28	Q6SWA3	FRCPRRFCF	741429	HLA-C*07:02	PBMC	CD8	NA	NA	NA	NA	TRBV15	NA	TRBJ2-5	NA	NA	NA	30587531	NA
10	CATSRVGGETQYF	PNH3	TRBV15	TRBJ2-5	Gargiulo et al., 2007	1	NA	CATSRTGGETQYF	Human	Pathogens	Cytomegalovirus (CMV)	D003586	NA	1	No	Yes	UL29/28	Q6SWA3	FRCPRRFCF	741429	HLA-C*07:02	PBMC	CD8	NA	NA	NA	NA	TRBV15	NA	TRBJ2-5	NA	NA	NA	30587531	NA
10	CATSRVGGETQYF	PNH3	TRBV15	TRBJ2-5	Gargiulo et al., 2007	1	NA	CATSREGGETQYF	Human	Pathogens	Cytomegalovirus (CMV)	D003586	NA	1	No	Yes	UL29/28	Q6SWA3	FRCPRRFCF	741429	HLA-C*07:02	PBMC	CD8	NA	NA	NA	NA	TRBV15	NA	TRBJ2-5	NA	NA	NA	30587531	NA
10	CATSRVGGETQYF	PNH3	TRBV15	TRBJ2-5	Gargiulo et al., 2007	1	NA	CATSRDGGETQYF	Human	Pathogens	Cytomegalovirus (CMV)	D003586	NA	1	No	Yes	UL29/28	Q6SWA3	FRCPRRFCF	741429	HLA-C*07:02	PBMC	CD8	NA	NA	NA	NA	TRBV15	NA	TRBJ2-5	NA	NA	NA	30587531	NA
10	CATSRVGGETQYF	PNH3	TRBV15	TRBJ2-5	Gargiulo et al., 2007	1	NA	CATSRVAGETQYF	Human	Pathogens	Cytomegalovirus (CMV)	D003586	NA	1	No	Yes	UL29/28	Q6SWA3	FRCPRRFCF	741429	HLA-C*07:02	PBMC	CD8	NA	NA	NA	NA	TRBV15	NA	TRBJ2-5	NA	NA	NA	30587531	NA
11	CATSREIGETQYF	PNH5	TRBV15	TRJB2-5	Gargiulo et al., 2007	1	NA	CATSREGGETQYF	Human	Pathogens	Cytomegalovirus (CMV)	D003586	NA	1	No	Yes	UL29/28	Q6SWA3	FRCPRRFCF	741429	HLA-C*07:02	PBMC	CD8	NA	NA	NA	NA	TRBV15	NA	TRBJ2-5	NA	NA	NA	30587531	NA
12	CATSRDLAGETQYF	PNH5	TRBV15	TRBJ2-5	Gargiulo et al., 2007	1	NA	CATSRDAGETQYF	Human	Pathogens	Cytomegalovirus (CMV)	D003586	NA	1	No	Yes	UL29/28	Q6SWA3	FRCPRRFCF	741429	HLA-C*07:02	PBMC	CD8	NA	NA	NA	NA	TRBV15	NA	TRBJ2-5	NA	NA	NA	30587531	NA

## Sheet: LGL
								Results of the CDR3 matching
Number in Query	Query	Patient UPN	V gene	J gene	NGS frequency	Reference	Dist	CDR3.alpha.aa	CDR3.beta.aa	Species	Category	Pathology	Pathology.Mesh.ID	Additional.study.details	Antigen.identification.method	Single.cell	NGS	Antigen.protein	Protein.ID	Epitope.peptide	Epitope.ID	MHC	Tissue	T.Cell.Type	T.cell.characteristics	CDR3.alpha.nt	TRAV	TRAJ	TRBV	TRBD	TRBJ	Reconstructed.J.annotation	CDR3.beta.nt	Mouse.strain	PubMed.ID	Remarks
18	CASSLGGRYSNQPQHF	UPN47	VB23	JB1.5	N.R.	Sandberg et al., 2014	1	NA	CASSLEGRYSNQPQHF	Human	Pathogens	Human immunodeficiency virus (HIV)	D006678	NA	1	No	Yes	Gag p24	P04585	KRWIILGLNK	33250	HLA-B*27:05	PBMC	CD8	NA	NA	NA	NA	TRBV7-02	NA	TRBJ1-5	No	NA	NA	22683743	NA
21	CASSLGTGGMETQYF	UPN7	VB8.2	JB2.5	N.R.	Sandberg et al., 2014	1	NA	CASSLGTGGWETQYF	Human	Pathogens	Cytomegalovirus (CMV)	D003586	NA	1	No	Yes	pp50	P16790	VTEHDTLLY	71290	HLA-A1	PBMC	CD8	NA	NA	NA	NA	TRBV7-9	NA	TRBJ2-5	No	TGTGCCAGCAGCTTAGGGACAGGGGGCTGGGAGACCCAGTACTTC	NA	28636589	NA
21	CASSLGTGGMETQYF	UPN7	VB8.2	JB2.5	N.R.	Sandberg et al., 2014	1	NA	CASSLGTGGWETQYF	Human	Pathogens	Influenza	D009980	NA	1	No	Yes	NP177	P03466	LPRRSGAAGA	38688	HLA-B7	PBMC	CD8	NA	NA	NA	NA	TRBV7-8	NA	TRBJ2-5	No	TGTGCCAGCAGCTTAGGGACAGGGGGCTGGGAGACCCAGTACTTC	NA	28636589	NA
22	CASSLAHSYNEQFF	UPN8	VB6.2	JB2.1	N.R.	Sandberg et al., 2014	1	NA	CASSLAHSGNEQFF	Human	Pathogens	M.Tuberculosis	D009169	Bulk	2.2	No	Yes	NA	NA	NA	NA	NA	PBMC	CD4	NA	NA	NA	NA	TRBV5-1	NA	NA	NA	NA	NA	32341563	NA
31	CASSWGGNQPQHF	UPN17	VB8.2	JB1.5	N.R.	Sandberg et al., 2014	1	NA	CASSLGGNQPQHF	Human	Cancer	Colorectal cancer	D015179	NA	3	No	Yes	NA	NA	NA	NA	NA	Colon/rectum	CD8	TIL	NA	NA	NA	TRBV28	NA	TRBJ1-5	No	TGTGCCAGCAGTCTGGGGGGGAATCAGCCCCAGCATTTT	NA	27465739	NA
31	CASSWGGNQPQHF	UPN17	VB8.2	JB1.5	N.R.	Sandberg et al., 2014	1	NA	CASSLGGNQPQHF	Human	Cancer	Colorectal cancer	D015179	NA	3	No	Yes	NA	NA	NA	NA	NA	Colon/rectum	CD8	TIL	NA	NA	NA	TRBV7-08	NA	TRBJ1-5	No	TGTGCCAGCAGCTTAGGGGGGAATCAGCCCCAGCATTTT	NA	27465739	NA
31	CASSWGGNQPQHF	UPN17	VB8.2	JB1.5	N.R.	Sandberg et al., 2014	1	NA	CASSLGGNQPQHF	Human	Cancer	Colorectal cancer	D015179	NA	3	No	Yes	NA	NA	NA	NA	NA	Colon/rectum	CD8	TIL	NA	NA	NA	TRBV7-08/TRBV7-02	NA	TRBJ1-5	No	TGTGCCAGCAGCTTAGGGGGGAATCAGCCCCAGCATTTT	NA	27465739	NA
31	CASSWGGNQPQHF	UPN17	VB8.2	JB1.5	N.R.	Sandberg et al., 2014	1	NA	CASSLGGNQPQHF	Human	Cancer	Colorectal cancer	D015179	NA	3	No	Yes	NA	NA	NA	NA	NA	Colon/rectum	CD8	TIL	NA	NA	NA	TRBV12-03/TRBV12-04	NA	TRBJ1-5	No	TGTGCCAGCAGTTTAGGAGGAAATCAGCCCCAGCATTTT	NA	27465739	NA
31	CASSWGGNQPQHF	UPN17	VB8.2	JB1.5	N.R.	Sandberg et al., 2014	1	NA	CASSLGGNQPQHF	Human	Cancer	Colorectal cancer	D015179	NA	3	No	Yes	NA	NA	NA	NA	NA	Colon/rectum	CD8	TIL	NA	NA	NA	TRBV27	NA	TRBJ1-5	No	TGTGCCAGCAGTTTAGGTGGAAATCAGCCCCAGCATTTT	NA	27465739	NA
31	CASSWGGNQPQHF	UPN17	VB8.2	JB1.5	N.R.	Sandberg et al., 2014	1	NA	CASSLGGNQPQHF	Human	Cancer	Colorectal cancer	D015179	NA	3	No	Yes	NA	NA	NA	NA	NA	Colon/rectum	CD8	TIL	NA	NA	NA	TRBV7-03	NA	TRBJ1-5	No	TGTGCCAGCAGCTTAGGGGGTAACCAGCCCCAGCATTTT	NA	27465739	NA
31	CASSWGGNQPQHF	UPN17	VB8.2	JB1.5	N.R.	Sandberg et al., 2014	1	NA	CASSLGGNQPQHF	Human	Cancer	Colorectal cancer	D015179	NA	3	No	Yes	NA	NA	NA	NA	NA	Colon/rectum	CD8	TIL	NA	NA	NA	TRBV7-03	NA	TRBJ1-5	No	TGTGCCAGCAGCTTAGGAGGAAATCAGCCCCAGCATTTT	NA	27465739	NA
31	CASSWGGNQPQHF	UPN17	VB8.2	JB1.5	N.R.	Sandberg et al., 2014	1	NA	CASSLGGNQPQHF	Human	Cancer	Colorectal cancer	D015179	NA	3	No	Yes	NA	NA	NA	NA	NA	Colon/rectum	CD8	TIL	NA	NA	NA	TRBV7-02	NA	TRBJ1-5	No	TGTGCCAGCAGCTTGGGCGGGAATCAGCCCCAGCATTTT	NA	27465739	NA
31	CASSWGGNQPQHF	UPN17	VB8.2	JB1.5	N.R.	Sandberg et al., 2014	1	NA	CASSLGGNQPQHF	Human	Cancer	Colorectal cancer	D015179	NA	3	No	Yes	NA	NA	NA	NA	NA	Colon/rectum	CD8	TIL	NA	NA	NA	TRBV4	NA	TRBJ1-5	No	TGTGCCAGCAGCTTAGGGGGGAATCAGCCCCAGCATTTT	NA	27465739	NA
31	CASSWGGNQPQHF	UPN17	VB8.2	JB1.5	N.R.	Sandberg et al., 2014	1	NA	CASSLGGNQPQHF	Human	Cancer	Colorectal cancer	D015179	NA	3	No	Yes	NA	NA	NA	NA	NA	Colon/rectum	CD8	TIL	NA	NA	NA	TRBV7-09	NA	TRBJ1-5	No	TGTGCCAGCAGCTTAGGGGGGAATCAGCCCCAGCATTTT	NA	27465739	NA
31	CASSWGGNQPQHF	UPN17	VB8.2	JB1.5	N.R.	Sandberg et al., 2014	1	NA	CASSLGGNQPQHF	Human	Cancer	Colorectal cancer	D015179	NA	3	No	Yes	NA	NA	NA	NA	NA	Colon/rectum	CD8	TIL	NA	NA	NA	TRBV7-02	NA	TRBJ1-5	No	TGTGCCAGCAGCCTTGGGGGCAATCAGCCCCAGCATTTT	NA	27465739	NA
31	CASSWGGNQPQHF	UPN17	VB8.2	JB1.5	N.R.	Sandberg et al., 2014	1	NA	CASSLGGNQPQHF	Human	Cancer	Colorectal cancer	D015179	NA	3	No	Yes	NA	NA	NA	NA	NA	Colon/rectum	CD8	TIL	NA	NA	NA	TRBV7-02	NA	TRBJ1-5	No	TGTGCCAGCAGCTTAGGAGGCAATCAGCCCCAGCATTTT	NA	27465739	NA
31	CASSWGGNQPQHF	UPN17	VB8.2	JB1.5	N.R.	Sandberg et al., 2014	1	NA	CASSLGGNQPQHF	Human	Cancer	Colorectal cancer	D015179	NA	3	No	Yes	NA	NA	NA	NA	NA	Colon/rectum	CD8	TIL	NA	NA	NA	TRBV12-03,TRBV12-04	NA	TRBJ1-5	No	TGTGCCAGCAGTTTAGGGGGGAATCAGCCCCAGCATTTT	NA	27465739	NA
31	CASSWGGNQPQHF	UPN17	VB8.2	JB1.5	N.R.	Sandberg et al., 2014	1	NA	CASSLGGNQPQHF	Human	Cancer	Colorectal cancer	D015179	NA	3	No	Yes	NA	NA	NA	NA	NA	Colon/rectum	CD8	TIL	NA	NA	NA	TRBV7-08	NA	TRBJ1-5	No	TGTGCCAGCAGCTTAGGAGGCAATCAGCCCCAGCATTTT	NA	27465739	NA
31	CASSWGGNQPQHF	UPN17	VB8.2	JB1.5	N.R.	Sandberg et al., 2014	1	NA	CASSLGGNQPQHF	Human	Cancer	Colorectal cancer	D015179	NA	3	No	Yes	NA	NA	NA	NA	NA	Colon/rectum	CD8	TIL	NA	NA	NA	TRBV7-02	NA	TRBJ1-5	No	TGTGCCAGCAGCTTAGGGGGCAATCAGCCCCAGCATTTT	NA	27465739	NA
31	CASSWGGNQPQHF	UPN17	VB8.2	JB1.5	N.R.	Sandberg et al., 2014	1	NA	CASSLGGNQPQHF	Human	Cancer	Colorectal cancer	D015179	NA	3	No	Yes	NA	NA	NA	NA	NA	Colon/rectum	CD8	TIL	NA	NA	NA	TRBV7-09	NA	TRBJ1-5	No	TGTGCCAGCAGCTTGGGAGGCAATCAGCCCCAGCATTTT	NA	27465739	NA
31	CASSWGGNQPQHF	UPN17	VB8.2	JB1.5	N.R.	Sandberg et al., 2014	1	NA	CASSLGGNQPQHF	Human	Cancer	Colorectal cancer	D015179	NA	3	No	Yes	NA	NA	NA	NA	NA	Colon/rectum	CD8	TIL	NA	NA	NA	TRBV5-05	NA	TRBJ1-5	No	TGTGCCAGCAGCTTGGGAGGTAATCAGCCCCAGCATTTT	NA	27465739	NA
31	CASSWGGNQPQHF	UPN17	VB8.2	JB1.5	N.R.	Sandberg et al., 2014	1	NA	CASSLGGNQPQHF	Human	Cancer	Colorectal cancer	D015179	NA	3	No	Yes	NA	NA	NA	NA	NA	Colon/rectum	CD8	TIL	NA	NA	NA	TRBV7-09	NA	TRBJ1-5	No	TGTGCCAGCAGCTTGGGCGGGAATCAGCCCCAGCATTTT	NA	27465739	NA
31	CASSWGGNQPQHF	UPN17	VB8.2	JB1.5	N.R.	Sandberg et al., 2014	1	NA	CASSLGGNQPQHF	Human	Cancer	Colorectal cancer	D015179	NA	3	No	Yes	NA	NA	NA	NA	NA	Colon/rectum	CD8	TIL	NA	NA	NA	TRBV12-03,TRBV12-04	NA	TRBJ1-5	No	TGTGCCAGCAGTTTAGGGGGCAATCAGCCCCAGCATTTT	NA	27465739	NA
31	CASSWGGNQPQHF	UPN17	VB8.2	JB1.5	N.R.	Sandberg et al., 2014	1	NA	CASSLGGNQPQHF	Human	Cancer	Colorectal cancer	D015179	NA	3	No	Yes	NA	NA	NA	NA	NA	Colon/rectum	CD8	TIL	NA	NA	NA	TRBV28	NA	TRBJ1-5	No	TGTGCCAGCAGTTTAGGGGGTAATCAGCCCCAGCATTTT	NA	27465739	NA
31	CASSWGGNQPQHF	UPN17	VB8.2	JB1.5	N.R.	Sandberg et al., 2014	1	NA	CASSLGGNQPQHF	Human	Cancer	Colorectal cancer	D015179	NA	3	No	Yes	NA	NA	NA	NA	NA	Colon/rectum	CD8	TIL	NA	NA	NA	TRBV11-02	NA	TRBJ1-5	No	TGTGCCAGCAGCTTAGGGGGCAATCAGCCCCAGCATTTT	NA	27465739	NA
31	CASSWGGNQPQHF	UPN17	VB8.2	JB1.5	N.R.	Sandberg et al., 2014	1	NA	CASSLGGNQPQHF	Human	Cancer	Colorectal cancer	D015179	NA	3	No	Yes	NA	NA	NA	NA	NA	Colon/rectum	CD8	TIL	NA	NA	NA	TRBV11-02	NA	TRBJ1-5	No	TGTGCCAGCAGCTTAGGAGGGAATCAGCCCCAGCATTTT	NA	27465739	NA
31	CASSWGGNQPQHF	UPN17	VB8.2	JB1.5	N.R.	Sandberg et al., 2014	1	NA	CASSLGGNQPQHF	Human	Cancer	Colorectal cancer	D015179	NA	3	No	Yes	NA	NA	NA	NA	NA	Colon/rectum	CD8	TIL	NA	NA	NA	TRBV11-02	NA	TRBJ1-5	No	TGTGCCAGCAGCTTAGGGGGAAATCAGCCCCAGCATTTT	NA	27465739	NA
31	CASSWGGNQPQHF	UPN17	VB8.2	JB1.5	N.R.	Sandberg et al., 2014	1	NA	CASSLGGNQPQHF	Human	Cancer	Colorectal cancer	D015179	NA	3	No	Yes	NA	NA	NA	NA	NA	Colon/rectum	CD8	TIL	NA	NA	NA	TRBV11-02	NA	TRBJ1-5	No	TGTGCCAGCAGCTTAGGGGGGAACCAGCCCCAGCATTTT	NA	27465739	NA
31	CASSWGGNQPQHF	UPN17	VB8.2	JB1.5	N.R.	Sandberg et al., 2014	1	NA	CASSWQGNQPQHF	Human	Pathogens	Influenza	D009980	NA	1	Yes	Yes	Matrix protein (M1)	P03485	GILGFVFTL	20354	HLA-A2	PBMC	CD8	NA	NA	TRAV6	NA	TRBV12-3	NA	NA	No	NA	NA	28636589	NA
31	CASSWGGNQPQHF	UPN17	VB8.2	JB1.5	N.R.	Sandberg et al., 2014	1	NA	CASSEGGNQPQHF	Human	Pathogens	Influenza	D009980	NA	1	No	Yes	NP177	P03466	LPRRSGAAGA	38688	HLA-B7	PBMC	CD8	NA	NA	NA	NA	TRBV11-2	NA	TRBJ1-5	No	TGTGCCAGCAGCGAAGGGGGCAATCAGCCCCAGCATTTT	NA	28636589	NA
31	CASSWGGNQPQHF	UPN17	VB8.2	JB1.5	N.R.	Sandberg et al., 2014	1	NA	CASSPGGNQPQHF	Human	Pathogens	Influenza	D009980	NA	1	No	Yes	NP177	P03466	LPRRSGAAGA	38688	HLA-B7	PBMC	CD8	NA	NA	NA	NA	TRBV4-1	NA	TRBJ1-5	No	TGCGCCAGCAGTCCGGGGGGCAATCAGCCCCAGCATTTT	NA	28636589	NA
31	CASSWGGNQPQHF	UPN17	VB8.2	JB1.5	N.R.	Sandberg et al., 2014	1	NA	CASSLGGNQPQHF	Human	Pathogens	Influenza	D009980	NA	1	No	Yes	NP177	P03466	LPRRSGAAGA	38688	HLA-B7	PBMC	CD8	NA	NA	NA	NA	TRBV7-6	NA	TRBJ1-5	No	TGTGCCAGCAGCTTAGGGGGCAATCAGCCCCAGCATTTT	NA	28636589	NA
31	CASSWGGNQPQHF	UPN17	VB8.2	JB1.5	N.R.	Sandberg et al., 2014	1	NA	CASSLGGNQPQHF	Human	Autoimmune	Celiac disease	D002446	NA	2.2	No	Yes	NA	NA	NA	NA	NA	Gut	CD4	NA	NA	NA	NA	TRBV7-8	NA	NA	No	NA	NA	29269859	NA
31	CASSWGGNQPQHF	UPN17	VB8.2	JB1.5	N.R.	Sandberg et al., 2014	1	NA	CASSLGGNQPQHF	Human	Autoimmune	Diabetes Type 1	D003947	NA	3	No	Yes	NA	NA	NA	NA	HLA-A*02	Pancreaticdraining lymph node	CD8	NA	NA	NA	NA	NA	NA	NA	No	NA	NA	27942583	NA
31	CASSWGGNQPQHF	UPN17	VB8.2	JB1.5	N.R.	Sandberg et al., 2014	1	NA	CASSLGGNQPQHF	Human	Autoimmune	Inflammatory bowel disease (IBD)	D015212	Chrohn's disease and Ulceritive colitis	2.2	No	Yes	Flagellin	P22251	NA	NA	NA	PBMC	CD4	NA	NA	NA	NA	TRBV11-3	NA	TRBJ1-5	No	NA	NA	29988119	NA
31	CASSWGGNQPQHF	UPN17	VB8.2	JB1.5	N.R.	Sandberg et al., 2014	1	NA	CASSLGGNQPQHF	Human	Autoimmune	Inflammatory bowel disease (IBD)	D015212	Chrohn's disease and Ulceritive colitis	2.2	No	Yes	Flagellin	P22251	NA	NA	NA	PBMC	CD4	NA	NA	NA	NA	TRBV5-6	NA	TRBJ1-5	No	NA	NA	29988119	NA
31	CASSWGGNQPQHF	UPN17	VB8.2	JB1.5	N.R.	Sandberg et al., 2014	1	NA	CASSVGGNQPQHF	Human	Pathogens	M.Tuberculosis	D009169	Bulk	2.2	No	Yes	NA	NA	NA	NA	NA	PBMC	CD4	NA	NA	NA	NA	TRBV9	NA	NA	NA	NA	NA	32341563	NA
31	CASSWGGNQPQHF	UPN17	VB8.2	JB1.5	N.R.	Sandberg et al., 2014	1	NA	CASSLGGNQPQHF	Human	Pathogens	M.Tuberculosis	D009169	Bulk	2.2	No	Yes	NA	NA	NA	NA	NA	PBMC	CD4	NA	NA	NA	NA	TRBV5-1	NA	NA	NA	NA	NA	32341563	NA
31	CASSWGGNQPQHF	UPN17	VB8.2	JB1.5	N.R.	Sandberg et al., 2014	1	NA	CASSWGGDQPQHF	Human	Pathogens	M.Tuberculosis	D009169	Bulk	2.2	No	Yes	NA	NA	NA	NA	NA	PBMC	CD4	NA	NA	NA	NA	TRBV27	NA	NA	NA	NA	NA	32341563	NA
34	CASSLDNYNEQFF	UPN20	VB5.6	JB2.1	N.R.	Sandberg et al., 2014	1	NA	CASSLDSYNEQFF	Human	Pathogens	Influenza	D009980	NA	1	No	Yes	NP177	P03466	LPRRSGAAGA	38688	HLA-B7	PBMC	CD8	NA	NA	NA	NA	TRBV7-6	NA	TRBJ2-1	No	TGTGCCAGCAGCCTTGACAGCTACAATGAGCAGTTCTTC	NA	28636589	NA
34	CASSLDNYNEQFF	UPN20	VB5.6	JB2.1	N.R.	Sandberg et al., 2014	1	CAEYSSASKIIF	CASSLDYNEQFF	Human	Cancer	Neoantigen	C050269	NA	1	Yes	NA	GNL3L-R4C	Q9NVN8	NLNCCSVPV	NA	HLA-A2	NA	NA	NA	NA	TRAV-2	NA	TRBV11-3	NA	NA	NA	NA	NA	30418433	NA
34	CASSLDNYNEQFF	UPN20	VB5.6	JB2.1	N.R.	Sandberg et al., 2014	1	NA	CASSLGDNYNEQFF	Human	Pathogens	Cytomegalovirus (CMV)	D003586	NA	1	No	Yes	pp65	P06725	RPHERNGFTVL	55170	HLA-B*07:02	PBMC	CD8	NA	NA	NA	NA	TRBV5-4	NA	TRBJ2-1	NA	NA	NA	30587531	NA
34	CASSLDNYNEQFF	UPN20	VB5.6	JB2.1	N.R.	Sandberg et al., 2014	1	CAVMDSNYQLIW	CASSDDNYNEQFF	Human	Pathogens	M. tuberculosis	D009169	NA	2.2	Yes	Yes	NA	NA	NA	NA	NA	PBMC	CD8	MAIT	NA	NA	TRAJ33	TRBV6-4	NA	TRBJ2-1	NA	NA	NA	30992377	NA
40	CASSPKGYGYTF	UPN25	VB12.2	JB1.2	N.R.	Sandberg et al., 2014	1	CAPAEGNTGKLIF	CASSPGGYGYTF	Human	Pathogens	M.Tuberculosis	D009169	NA	2.2	Yes	Yes	NA	NA	NA	NA	NA	PBMC	CD4	NA	NA	TRAV9-1	TRAJ37	TRBV19	NA	TRBJ1-2	NA	NA	NA	32341563	NA
41	CASSLGSGYGYTF	UPN26	VB5.1	JB1.2	N.R.	Sandberg et al., 2014	1	NA	CASSLGSGNYGYTF	Human	Pathogens	Epstein Barr virus (EBV)	D020031	EBV	1	No	No	EBNA- 3B	K9US25	IVTDFSVIK	29466	HLA-A*11:01	PBMC	NA	NA	NA	NA	NA	TRBV9	NA	TRBJ1-2	No	NA	NA	24512815	NA
41	CASSLGSGYGYTF	UPN26	VB5.1	JB1.2	N.R.	Sandberg et al., 2014	1	NA	CASSLGRGYGYTF	Human	Cancer	Merkel cell carcinoma	D015266	NA	1	No	Yes	LTAg	U6C645	WEDLFCDESLSSPEPPSSSE	NA	DRB1*04-01	Skin tumor	CD4	TIL	TGTGCCAGCAGTTTAGGCAGGGGCTATGGCTACACCTTC	NA	NA	TRBV28-1*01	TRBD1-1*01	TRBJ1-2*01	NA	NA	NA	31405946	NA
46	CASSLGGPQHF	UPN5	VB8	JB1.5	1	O'Keefe et al., 2004	1	CAMSGDYKLSF	CASSLSGGPQHF	Human	Cancer	Neoantigen	C050269	NA	1	Yes	No	VN1R2-LML-L3F	Q8NFZ6	LMFWASSSI	NA	HLA-A2	NA	NA	NA	NA	TRAV27	NA	TRBV11-2	NA	NA	NA	NA	NA	30418433	NA
72	CASSLRAGGPNEQFF	UPN48	TCRBV11-02	TCRBJ02-01	0.64	Rajala et al., 2015	1	NA	CASSLEAGGPNEQFF	Human	Pathogens	M.Tuberculosis	D009169	Bulk	2.2	No	Yes	NA	NA	NA	NA	NA	PBMC	CD4	NA	NA	NA	NA	TRBV11-2	NA	NA	NA	NA	NA	32341563	NA
76	CASSQTSGGEYNEQFF	UPN48	TCRBV04-01	TCRBJ02-01	0.02	Rajala et al., 2015	1	NA	CASSQTSGGAYNEQFF	Human	Pathogens	M.Tuberculosis	D009169	Bulk	2.2	No	Yes	NA	NA	NA	NA	NA	PBMC	CD4	NA	NA	NA	NA	TRBV13	NA	NA	NA	NA	NA	32341563	NA
77	CASSPRTGYSNQPQHF	UPN14	TCRBV19-01	TCRBJ01-05	0.83	Rajala et al., 2015	1	CAVQGGTASKLTF	CASSPRTGGSNQPQHF	Human	Pathogens	HTLV-1	D015368	Chronic	3	No	Yes	NA	NA	NA	NA	NA	PBMC	CD4	NA	TGTGCAGTTCAGGGGGGCACTGCCAGTAAACTCACCTTT	NA	TRAJ44	NA	TRBD1	TRBJ1-5	NA	TGTGCCAGTAGTCCCCGGACAGGGGGAAGTAATCAGCCCCAGCATTTT	NA	31069115	NA
79	CASSVPGGEQYF	UPN27	VB13	JB2-7	Minor	Wlordaski et al., 2005	1	NA	CASSGPGGEQYF	Human	Pathogens	Human immunodeficiency virus (HIV)	D006870	NA	1	No	No	Gag p24	P04585	KAFSPEVIPMF	29804	HLA-B*57:01	PBMC	CD8	NA	NA	NA	NA	TRBV28-01	NA	TRBJ2-7	No	NA	NA	18802118	NA
79	CASSVPGGEQYF	UPN27	VB13	JB2-7	Minor	Wlordaski et al., 2005	1	NA	CASSGPGGEQYF	Human	Pathogens	Human immunodeficiency virus (HIV)	D006678	Chronic Human immunodeficiency virus (HIV)+ patients off anti-retroviral therapy	1	No	No	Gag p24	P04585	KAFSPEVIPMF	29804	HLA-B*57	PBMC	CD8	NA	NA	NA	NA	TRBV28-01	NA	TRBJ2-7	No	NA	NA	21562156	NA
79	CASSVPGGEQYF	UPN27	VB13	JB2-7	Minor	Wlordaski et al., 2005	1	CAIRNSGNTPLVF	CASSVAGGEQYF	Human	Pathogens	HTLV-1	D015368	Acute	3	No	Yes	NA	NA	NA	NA	NA	PBMC	CD4	NA	TGTGCAATCCGGAATTCAGGAAACACACCTCTTGTCTTT	NA	TRAJ29	NA	TRBD1	TRBJ2-7	NA	TGTGCCAGCAGCGTAGCAGGGGGCGAGCAGTACTTC	NA	31069115	NA
80	CASSVPGGEQYF	UPN27	VB13	JB2-7	Minor	Wlordaski et al., 2005	1	NA	CASSGPGGEQYF	Human	Pathogens	Human immunodeficiency virus (HIV)	D006870	NA	1	No	No	Gag p24	P04585	KAFSPEVIPMF	29804	HLA-B*57:01	PBMC	CD8	NA	NA	NA	NA	TRBV28-01	NA	TRBJ2-7	No	NA	NA	18802118	NA
80	CASSVPGGEQYF	UPN27	VB13	JB2-7	Minor	Wlordaski et al., 2005	1	NA	CASSGPGGEQYF	Human	Pathogens	Human immunodeficiency virus (HIV)	D006678	Chronic Human immunodeficiency virus (HIV)+ patients off anti-retroviral therapy	1	No	No	Gag p24	P04585	KAFSPEVIPMF	29804	HLA-B*57	PBMC	CD8	NA	NA	NA	NA	TRBV28-01	NA	TRBJ2-7	No	NA	NA	21562156	NA
80	CASSVPGGEQYF	UPN27	VB13	JB2-7	Minor	Wlordaski et al., 2005	1	CAIRNSGNTPLVF	CASSVAGGEQYF	Human	Pathogens	HTLV-1	D015368	Acute	3	No	Yes	NA	NA	NA	NA	NA	PBMC	CD4	NA	TGTGCAATCCGGAATTCAGGAAACACACCTCTTGTCTTT	NA	TRAJ29	NA	TRBD1	TRBJ2-7	NA	TGTGCCAGCAGCGTAGCAGGGGGCGAGCAGTACTTC	NA	31069115	NA
81	CASSVPGGEQYF	UPN27	VB13	JB2-7	Minor	Wlordaski et al., 2005	1	NA	CASSGPGGEQYF	Human	Pathogens	Human immunodeficiency virus (HIV)	D006870	NA	1	No	No	Gag p24	P04585	KAFSPEVIPMF	29804	HLA-B*57:01	PBMC	CD8	NA	NA	NA	NA	TRBV28-01	NA	TRBJ2-7	No	NA	NA	18802118	NA
81	CASSVPGGEQYF	UPN27	VB13	JB2-7	Minor	Wlordaski et al., 2005	1	NA	CASSGPGGEQYF	Human	Pathogens	Human immunodeficiency virus (HIV)	D006678	Chronic Human immunodeficiency virus (HIV)+ patients off anti-retroviral therapy	1	No	No	Gag p24	P04585	KAFSPEVIPMF	29804	HLA-B*57	PBMC	CD8	NA	NA	NA	NA	TRBV28-01	NA	TRBJ2-7	No	NA	NA	21562156	NA
81	CASSVPGGEQYF	UPN27	VB13	JB2-7	Minor	Wlordaski et al., 2005	1	CAIRNSGNTPLVF	CASSVAGGEQYF	Human	Pathogens	HTLV-1	D015368	Acute	3	No	Yes	NA	NA	NA	NA	NA	PBMC	CD4	NA	TGTGCAATCCGGAATTCAGGAAACACACCTCTTGTCTTT	NA	TRAJ29	NA	TRBD1	TRBJ2-7	NA	TGTGCCAGCAGCGTAGCAGGGGGCGAGCAGTACTTC	NA	31069115	NA
92	CASSGEETQYF	UPN23	VB3	JB2-3	Minor	Wlordaski et al., 2005	1	CIVKTNSGGSNYKLTF	CASSFEETQYF	Human	Pathogens	M. tuberculosis	D009169	NA	2.1	No	Yes	CFP10	P9WNK5	TAAQAAVVRFQEAAN	62799	DRB1*15:03	PBMC	CD4	NA	NA	NA	NA	NA	NA	TRBJ2-5	No	NA	NA	28636589	Reconstruted J
92	CASSGEETQYF	UPN23	VB3	JB2-3	Minor	Wlordaski et al., 2005	1	CIVHTNSGGSNYKLTF	CASSPEETQYF	Human	Pathogens	M. tuberculosis	D009169	NA	2.1	No	Yes	CFP10	P9WNK5	TAAQAAVVRFQEAAN	62799	DRB1*15:03	PBMC	CD4	NA	NA	NA	NA	NA	NA	TRBJ2-5	No	NA	NA	28636589	Reconstruted J
92	CASSGEETQYF	UPN23	VB3	JB2-3	Minor	Wlordaski et al., 2005	1	CIEHTNSGGSNYKLTF	CASSLEETQYF	Human	Pathogens	M. tuberculosis	D009169	NA	2.1	No	Yes	CFP10	P9WNK5	TAAQAAVVRFQEAAN	62799	DRB1*15:03	PBMC	CD4	NA	NA	NA	NA	NA	NA	TRBJ2-5	No	NA	NA	28636589	Reconstruted J
92	CASSGEETQYF	UPN23	VB3	JB2-3	Minor	Wlordaski et al., 2005	1	NA	CASSLEETQYF	Human	Autoimmune	Celiac disease	D002446	NA	2.2	No	Yes	NA	NA	NA	NA	NA	PBMC	CD4	NA	NA	NA	NA	TRBV2-1	NA	NA	No	NA	NA	29269859	NA
92	CASSGEETQYF	UPN23	VB3	JB2-3	Minor	Wlordaski et al., 2005	1	NA	CASSTEETQYF	Human	Pathogens	Cytomegalovirus (CMV)	D003586	NA	1	Yes	Yes	pp65	P06725	NLVPMVATV	44920	HLA-A2	PBMC	CD8	NA	NA	NA	NA	TRBV9	NA	TRBJ1-4	No	NA	NA	28423320	NA
92	CASSGEETQYF	UPN23	VB3	JB2-3	Minor	Wlordaski et al., 2005	1	NA	CASSLEETQYF	Human	Autoimmune	Inflammatory bowel disease (IBD)	D015212	Chrohn's disease and Ulceritive colitis	2.2	No	Yes	Flagellin	P22251	NA	NA	NA	PBMC	CD4	NA	NA	NA	NA	TRBV7-8	NA	TRBJ2-5	No	NA	NA	29988119	NA
92	CASSGEETQYF	UPN23	VB3	JB2-3	Minor	Wlordaski et al., 2005	1	NA	CASSVGEETQYF	Human	Autoimmune	Psoriatic arthritis	D015535	NA	2.2	No	Yes	NA	NA	NA	NA	NA	Skin	NA	NA	NA	NA	NA	TRBV-9	NA	NA	NA	CTAAACCTGAGCTCTCTGGAGCTGGGGGACTCAGCTTTGTATTTCTGTGCCAGCAGCGTAGGGGAGGAGACCCAGTACTTCGGGCCA	NA	28945199	NA
92	CASSGEETQYF	UPN23	VB3	JB2-3	Minor	Wlordaski et al., 2005	1	CAVRDEDYKLSF	CASSFEETQYF	Human	Pathogens	M. tuberculosis	D009169	NA	2.2	Yes	Yes	NA	NA	NA	NA	NA	PBMC	CD8	NA	NA	NA	TRAJ20	TRBV7-2	NA	TRBJ2-5	NA	NA	NA	30992377	NA
92	CASSGEETQYF	UPN23	VB3	JB2-3	Minor	Wlordaski et al., 2005	1	CAVSDSNYQLIW	CASSFEETQYF	Human	Pathogens	M. tuberculosis	D009169	NA	2.2	Yes	Yes	NA	NA	NA	NA	NA	PBMC	CD8	NA	NA	NA	TRAJ33	TRBV7-2	NA	TRBJ2-5	NA	NA	NA	30992377	NA
92	CASSGEETQYF	UPN23	VB3	JB2-3	Minor	Wlordaski et al., 2005	1	NA	CASSFEETQYF	Human	Pathogens	M.Tuberculosis	D009169	NA	2.2	Yes	Yes	NA	NA	NA	NA	NA	PBMC	CD4	NA	NA	NA	NA	TRBV7-2	NA	TRBJ2-5	NA	NA	NA	32341563	NA
92	CASSGEETQYF	UPN23	VB3	JB2-3	Minor	Wlordaski et al., 2005	1	NA	CASSFEETQYF	Human	Pathogens	M.Tuberculosis	D009169	Bulk	2.2	No	Yes	NA	NA	NA	NA	NA	PBMC	CD4	NA	NA	NA	NA	TRBV7-2	NA	NA	NA	NA	NA	32341563	NA
92	CASSGEETQYF	UPN23	VB3	JB2-3	Minor	Wlordaski et al., 2005	1	NA	CASSPEETQYF	Human	Pathogens	M.Tuberculosis	D009169	Bulk	2.2	No	Yes	NA	NA	NA	NA	NA	PBMC	CD4	NA	NA	NA	NA	TRBV7-2	NA	NA	NA	NA	NA	32341563	NA
93	CASSGETDTQYF	UPN33	VB18	JB2-3	Minor	Wlordaski et al., 2005	1	NA	CASSGDTDTQYF	Human	Pathogens	Influenza	D009980	NA	1	No	Yes	NP177	P03466	LPRRSGAAGA	38688	HLA-B7	PBMC	CD8	NA	NA	NA	NA	TRBV7-8	NA	TRBJ2-3	No	TGTGCCAGCAGCGGGGACACAGATACGCAGTATTTT	NA	28636589	NA
93	CASSGETDTQYF	UPN33	VB18	JB2-3	Minor	Wlordaski et al., 2005	1	CAMREGQGRGSTLGRLYF	CASSGELTDTQYF	Human	Cancer	Neoantigen	C050269	NA	1	Yes	No	RYR3-VLN	NA	VLNYFEPYL	NA	HLA-A2	NA	NA	NA	NA	TRAV29/DV5	NA	TRBV11-3	NA	NA	NA	NA	NA	30418433	NA
94	CASSLAGGPDTQYF	UPN62	VB13	JB2-3	Minor	Wlordaski et al., 2005	1	NA	CASSLAGGPTDTQYF	Human	Cancer	Colorectal cancer	D015179	NA	3	No	No	NA	NA	NA	NA	NA	Colon/rectum	CD8	TIL	NA	NA	NA	TRBV7-02	NA	TRBJ2-3	No	NA	NA	23771160	NA
94	CASSLAGGPDTQYF	UPN62	VB13	JB2-3	Minor	Wlordaski et al., 2005	1	CALSGNTPLVF	CASSLAGGTDTQYF	Human	Pathogens	M. tuberculosis	D009169	NA	2.2	Yes	Yes	NA	NA	NA	NA	NA	PBMC	CD8	NA	NA	NA	TRAJ29	TRBV6-4	NA	TRBJ2-3	NA	NA	NA	30992377	NA
94	CASSLAGGPDTQYF	UPN62	VB13	JB2-3	Minor	Wlordaski et al., 2005	1	CAVMDSSYKLIF	CASSGLAGGPDTQYF	Human	Pathogens	M. tuberculosis	D009169	NA	2.2	Yes	Yes	NA	NA	NA	NA	NA	PBMC	CD8	NA	NA	NA	TRAJ12	TRBV6-1	TRBD2	TRBJ2-3	NA	NA	NA	30992377	NA
94	CASSLAGGPDTQYF	UPN62	VB13	JB2-3	Minor	Wlordaski et al., 2005	1	CAVMDSSYKLIF	CASSGLAGGPDTQYF	Human	Pathogens	M. tuberculosis	D009169	NA	2.2	Yes	Yes	NA	NA	NA	NA	NA	PBMC	CD8	NA	NA	NA	TRAJ12	TRBV6-1	TRBD2	TRBJ2-3	NA	NA	NA	30992377	NA
94	CASSLAGGPDTQYF	UPN62	VB13	JB2-3	Minor	Wlordaski et al., 2005	1	CALKNVGDSARQLTF	CASSGLAGGPDTQYF	Human	Pathogens	M. tuberculosis	D009169	NA	2.2	Yes	Yes	NA	NA	NA	NA	NA	PBMC	CD8	NA	NA	NA	TRAJ22	TRBV6-1	TRBD2	TRBJ2-3	NA	NA	NA	30992377	NA
94	CASSLAGGPDTQYF	UPN62	VB13	JB2-3	Minor	Wlordaski et al., 2005	1	CAVEGNNARLMF	CASSLATGGPDTQYF	Human	Pathogens	M. tuberculosis	D009169	NA	2.2	Yes	Yes	NA	NA	NA	NA	NA	PBMC	CD8	NA	NA	NA	TRAJ31	TRBV12-3	NA	TRBJ2-3	NA	NA	NA	30992377	NA
94	CASSLAGGPDTQYF	UPN62	VB13	JB2-3	Minor	Wlordaski et al., 2005	1	CAVMDSSYKLIF	CASSELAGGPDTQYF	Human	Pathogens	M. tuberculosis	D009169	NA	2.2	Yes	Yes	NA	NA	NA	NA	NA	PBMC	CD8	NA	NA	NA	TRAJ12	TRBV6-1	NA	TRBJ2-3	NA	NA	NA	30992377	NA
94	CASSLAGGPDTQYF	UPN62	VB13	JB2-3	Minor	Wlordaski et al., 2005	1	CAYRSATFGSGANSKLTF	CASSLAGSPDTQYF	Human	Pathogens	M.Tuberculosis	D009169	NA	2.2	Yes	Yes	NA	NA	NA	NA	NA	PBMC	CD4	NA	NA	mTRDV2-2	TRAJ56	TRBV5-1	NA	TRBJ2-3	NA	NA	NA	32341563	NA
94	CASSLAGGPDTQYF	UPN62	VB13	JB2-3	Minor	Wlordaski et al., 2005	1	NA	CASSVAGGPDTQYF	Human	Pathogens	M.Tuberculosis	D009169	NA	2.2	Yes	Yes	NA	NA	NA	NA	NA	PBMC	CD4	NA	NA	TRAV3	TRAJ8	TRBV6-4	NA	TRBJ2-3	NA	NA	NA	32341563	NA
95	CASSLAGTGGGEQYF	UPN47	VB6	JB2-7	Minor	Wlordaski et al., 2005	1	CAASGTYKYIF	CASSLGTGGGEQYF	Human	Pathogens	M.Tuberculosis	D009169	NA	2.2	Yes	Yes	NA	NA	NA	NA	NA	PBMC	CD4	NA	NA	mTRAV14D-1	TRAJ40	TRBV7-6	NA	TRBJ2-7	NA	NA	NA	32341563	NA
96	CASSLAGTSSTDTQYF	UPN47	VB6	JB2-3	Minor	Wlordaski et al., 2005	1	CAVPDDKIIF	CASSLGTSSTDTQYF	Human	Cancer	Neoantigen	C050269	NA	1	Yes	No	RYR3-VLN-E6K	NA	VLNYFKPYL	NA	HLA-A2	NA	NA	NA	NA	TRAV25	NA	TRBV5-4	NA	NA	NA	NA	NA	30418433	NA
101	CASSLVGDPGELF	UPN35	VB6	JB2-2	Minor	Wlordaski et al., 2005	1	NA	CASSLVGPPGELF	Human	Pathogens	Human immunodeficiency virus (HIV)	D006678	Chronic Human immunodeficiency virus (HIV)+ patients off anti-retroviral therapy	1	No	No	Gag-Pol poliprotein	P04585	LPPIVAKEI	NA	HLA-B*42:01	PBMC	CD8	NA	NA	NA	NA	TRBV5-05	NA	TRBJ2-2	No	NA	NA	25911754	NA

## Sheet: HC
							Results of the CDR3 matching
Number in Query	CDR3 sequency	Patient UPN	V gene	J gene	NGS frequency	Reference	Dist	CDR3.alpha.aa	CDR3.beta.aa	Species	Category	Pathology	Pathology.Mesh.ID	Additional.study.details	Antigen.identification.method	Single.cell	NGS	Antigen.protein	Protein.ID	Epitope.peptide	Epitope.ID	MHC	Tissue	T.Cell.Type	T.cell.characteristics	CDR3.alpha.nt	TRAV	TRAJ	TRBV	TRBD	TRBJ	Reconstructed.J.annotation	CDR3.beta.nt	Mouse.strain	PubMed.ID	Remarks
2	CASSLDPGSYEQYF	HC1	TRBV5-6	TRBJ2-7	0.091	Giudice et al., 2018	1	NA	CASSLDPGLYEQYF	Human	Cancer	Cervical cancer	D002583	NA	3	No	No	NA	NA	NA	NA	NA	PBMC	NA	TIL	NA	TRAV26-1	NA	NA	NA	TRBJ2-7	No	NA	NA	30524447	NA
2	CASSLDPGSYEQYF	HC1	TRBV5-6	TRBJ2-7	0.091	Giudice et al., 2018	1	CAVRPLRRSQGNLIF	CASSLDGSYEQYF	Human	Pathogens	HTLV-1	D015368	Acute	3	No	Yes	NA	NA	NA	NA	NA	PBMC	CD4	NA	TGTGCTGTCAGGCCCCTCCGAAGAAGCCAAGGAAATCTCATCTTT	NA	TRAJ42	NA	NA	TRBJ2-7	NA	TGTGCCAGCAGCTTAGATGGCAGCTACGAGCAGTACTTC	NA	31069115	NA
2	CASSLDPGSYEQYF	HC1	TRBV5-6	TRBJ2-7	0.091	Giudice et al., 2018	1	NA	CASSLDRGSYEQYF	Human	Pathogens	M.Tuberculosis	D009169	Bulk	22	No	Yes	NA	NA	NA	NA	NA	PBMC	CD4	NA	NA	NA	NA	TRBV7-6	NA	NA	NA	NA	NA	32341563	NA
2	CASSLDPGSYEQYF	HC1	TRBV5-6	TRBJ2-7	0.091	Giudice et al., 2018	1	NA	CASSLMPGSYEQYF	Human	Pathogens	M.Tuberculosis	D009169	Bulk	22	No	Yes	NA	NA	NA	NA	NA	PBMC	CD4	NA	NA	NA	NA	TRBV5-1	NA	NA	NA	NA	NA	32341563	NA
2	CASSLDPGSYEQYF	HC1	TRBV5-6	TRBJ2-7	0.091	Giudice et al., 2018	1	NA	CASSLDPGLYEQYF	Human	Cancer	Cervical carcinoma	D002583	NA	4	NA	NA	NA	NA	NA	NA	NA	PBMC	NA	NA	NA	NA	NA	NA	NA	NA	NA	NA	NA	30524447	NA
4	CASSSANYGYTF	HC2	TRBV12-4,12-3	TRBJ1-2	0.088	Giudice et al., 2018	0	NA	CASSSANYGYTF	Human	Pathogens	Cytomegalovirus (CMV)	D003586	CMV	1	No	No	pp65	P06725	NLVPMVATV	44920	HLA-A*02:01	PBMC	CD8	NA	NA	NA	NA	TRBV8	NA	TRBJ1-2	No	NA	NA	12616496	NA
4	CASSSANYGYTF	HC2	TRBV12-4,12-3	TRBJ1-2	0.088	Giudice et al., 2018	1	CAVYGTASKLTF	CASSSAFYGYTF	Human	Pathogens	Cytomegalovirus (CMV)	D003586	CMV	1	No	No	pp65	P06725	NLVPMVATV	44920	HLA-A*02	PBMC	CD8	NA	NA	TRAV23	TRAJ44	TRBV8	NA	TRBJ2-1	No	NA	NA	16237109	NA
4	CASSSANYGYTF	HC2	TRBV12-4,12-3	TRBJ1-2	0.088	Giudice et al., 2018	1	CAGPRQTSYDKVIF	CASSSAHYGYTF	Human	Pathogens	Cytomegalovirus (CMV)	D003586	CMV	1	No	No	pp65	P06725	NLVPMVATV	44920	HLA-A*02	PBMC	CD8	NA	NA	TRAV25	TRAJ50	TRBV8	NA	TRBJ1-2	No	NA	NA	16237109	NA
4	CASSSANYGYTF	HC2	TRBV12-4,12-3	TRBJ1-2	0.088	Giudice et al., 2018	0	CAVDIETSGSRLTF	CASSSANYGYTF	Human	Pathogens	Cytomegalovirus (CMV)	D003586	CMV	1	No	No	pp65	P06725	NLVPMVATV	44920	HLA-A*02	PBMC	CD8	NA	NA	TRAV27	TRAJ58	TRBV8	NA	TRBJ1-2	No	NA	NA	16237109	NA
4	CASSSANYGYTF	HC2	TRBV12-4,12-3	TRBJ1-2	0.088	Giudice et al., 2018	0	CAVYFGNVLHCG	CASSSANYGYTF	Human	Pathogens	Cytomegalovirus (CMV)	D003586	CMV	1	No	No	pp65	P06725	NLVPMVATV	44920	HLA-A*02	PBMC	CD8	NA	NA	TRAV16	TRAJ35	TRBV8	NA	TRBJ1-2	No	NA	NA	16237109	NA
4	CASSSANYGYTF	HC2	TRBV12-4,12-3	TRBJ1-2	0.088	Giudice et al., 2018	0	CAGPRKTSYDKVIF	CASSSANYGYTF	Human	Pathogens	Cytomegalovirus (CMV)	D003586	CMV	1	No	No	pp65	P06725	NLVPMVATV	44920	HLA-A*02	PBMC	CD8	NA	NA	TRAV25	TRAJ50	TRBV8	NA	TRBJ1-2	No	NA	NA	16237109	NA
4	CASSSANYGYTF	HC2	TRBV12-4,12-3	TRBJ1-2	0.088	Giudice et al., 2018	1	NA	CASSSAHYGYTF	Human	Pathogens	Cytomegalovirus (CMV)	D003586	CMV	1	No	No	pp65	P06725	NLVPMVATV	44920	HLA-A*02:01	PBMC	CD8	NA	NA	NA	NA	TRBV12-04	NA	TRBJ1-2	No	NA	NA	16287711	NA
4	CASSSANYGYTF	HC2	TRBV12-4,12-3	TRBJ1-2	0.088	Giudice et al., 2018	0	NA	CASSSANYGYTF	Human	Pathogens	Cytomegalovirus (CMV)	D003586	CMV	1	No	No	pp65	P06725	NLVPMVATV	44920	HLA-A*02:01	PBMC	CD8	NA	NA	NA	NA	TRBV12-04	NA	TRBJ1-2	No	NA	NA	16287711	NA
4	CASSSANYGYTF	HC2	TRBV12-4,12-3	TRBJ1-2	0.088	Giudice et al., 2018	1	NA	CASSSAYYGYTF	Human	Pathogens	Cytomegalovirus (CMV)	D003586	CMV	1	No	No	pp65	P06725	NLVPMVATV	44920	HLA-A*02:01	PBMC	CD8	NA	NA	NA	NA	TRBV12-04	NA	TRBJ1-2	No	NA	NA	16287711	NA
4	CASSSANYGYTF	HC2	TRBV12-4,12-3	TRBJ1-2	0.088	Giudice et al., 2018	1	NA	CASSSAHYGYTF	Human	Pathogens	Cytomegalovirus (CMV)	D003586	CMV	1	No	No	CMV-NV9	NA	NLVPMVATV	44920	HLA-A*02:01	PBMC	CD8	NA	NA	NA	NA	TRBV12-04	NA	TRBJ1-2	No	NA	NA	19017975	NA
4	CASSSANYGYTF	HC2	TRBV12-4,12-3	TRBJ1-2	0.088	Giudice et al., 2018	0	NA	CASSSANYGYTF	Human	Pathogens	Cytomegalovirus (CMV)	D003586	CMV	1	No	No	CMV-NV9	NA	NLVPMVATV	44920	HLA-A*02:01	PBMC	CD8	NA	NA	NA	NA	TRBV12-04	NA	TRBJ1-2	No	NA	NA	19017975	NA
4	CASSSANYGYTF	HC2	TRBV12-4,12-3	TRBJ1-2	0.088	Giudice et al., 2018	1	NA	CASSSAYYGYTF	Human	Pathogens	Cytomegalovirus (CMV)	D003586	CMV	1	No	No	CMV-NV9	NA	NLVPMVATV	44920	HLA-A*02:01	PBMC	CD8	NA	NA	NA	NA	TRBV12-04	NA	TRBJ1-2	No	NA	NA	19017975	NA
4	CASSSANYGYTF	HC2	TRBV12-4,12-3	TRBJ1-2	0.088	Giudice et al., 2018	1	CAGPMKTSYDKVIF	CASASANYGYTF	Human	Pathogens	Cytomegalovirus (CMV)	D003586	NA	1	Yes	Yes	pp65	P06725	NLVPMVATV	44920	HLA-A*02:01	PBMC	CD8	NA	NA	TRAV35:01	TRAJ5-01	TRBV1-01	NA	TRBJ1-2:01	No	NA	NA	28636592	NA
4	CASSSANYGYTF	HC2	TRBV12-4,12-3	TRBJ1-2	0.088	Giudice et al., 2018	1	CAGPRETSYDKVIF	CASASANYGYTF	Human	Pathogens	Cytomegalovirus (CMV)	D003586	NA	1	Yes	Yes	pp65	P06725	NLVPMVATV	44920	HLA-A*02:01	PBMC	CD8	NA	NA	TRAV35:01	TRAJ5-01	TRBV1-01	NA	TRBJ1-2:01	No	NA	NA	28636592	NA
4	CASSSANYGYTF	HC2	TRBV12-4,12-3	TRBJ1-2	0.088	Giudice et al., 2018	0	CAGPMKTSYDKVIF	CASSSANYGYTF	Human	Pathogens	Influenza	D009980	NA	1	Yes	Yes	Matrix protein (M1)	P03485	GILGFVFTL	20354	HLA-A*02:01	PBMC	CD8	NA	NA	TRAV35:01	TRAJ5-01	TRBV1-01	NA	TRBJ1-2:01	No	NA	NA	28636592	NA
4	CASSSANYGYTF	HC2	TRBV12-4,12-3	TRBJ1-2	0.088	Giudice et al., 2018	1	CAGPRETSYDKVIF	CASSSAYYGYTF	Human	Pathogens	Cytomegalovirus (CMV)	D003586	NA	1	Yes	Yes	pp65	P06725	NLVPMVATV	44920	HLA-A*02:01	PBMC	CD8	NA	NA	TRAV35:01	TRAJ5-01	TRBV1-01	NA	TRBJ1-2:01	No	NA	NA	28636592	NA
4	CASSSANYGYTF	HC2	TRBV12-4,12-3	TRBJ1-2	0.088	Giudice et al., 2018	0	NA	CASSSANYGYTF	Human	Pathogens	Cytomegalovirus (CMV)	D003586	NA	1	Yes	Yes	pp65	P06725	NLVPMVATV	44920	HLA-A2	PBMC	CD8	NA	NA	NA	NA	TRBV12-3	NA	NA	No	NA	NA	28636589	NA
4	CASSSANYGYTF	HC2	TRBV12-4,12-3	TRBJ1-2	0.088	Giudice et al., 2018	0	NA	CASSSANYGYTF	Human	Pathogens	Cytomegalovirus (CMV)	D003586	NA	1	Yes	Yes	pp65	P06725	NLVPMVATV	44920	HLA-A2	PBMC	CD8	NA	NA	NA	NA	TRBV12-3	NA	NA	No	NA	NA	28636589	NA
4	CASSSANYGYTF	HC2	TRBV12-4,12-3	TRBJ1-2	0.088	Giudice et al., 2018	0	CAARTRGSTLGRLYF	CASSSANYGYTF	Human	Pathogens	Cytomegalovirus (CMV)	D003586	NA	1	Yes	Yes	pp65	P06725	NLVPMVATV	44920	HLA-A2	PBMC	CD8	NA	NA	TRAV21	NA	TRBV12-3	NA	NA	No	NA	NA	28636589	NA
4	CASSSANYGYTF	HC2	TRBV12-4,12-3	TRBJ1-2	0.088	Giudice et al., 2018	0	CAAPRETSYDKVIF	CASSSANYGYTF	Human	Pathogens	Cytomegalovirus (CMV)	D003586	NA	1	Yes	NA	pp65	P06725	NLVPMVATV	44921	HLA-A2	NA	NA	NA	NA	TRAV12-2	NA	TRBV12-3,12-4	NA	NA	NA	NA	NA	30418433	NA
4	CASSSANYGYTF	HC2	TRBV12-4,12-3	TRBJ1-2	0.088	Giudice et al., 2018	0	CAGPTKTSYDKVIF	CASSSANYGYTF	Human	Pathogens	Cytomegalovirus (CMV)	D003586	NA	1	Yes	NA	pp65	P06725	NLVPMVATV	44921	HLA-A2	NA	NA	NA	NA	NA	NA	TRBV12-3,12-4	NA	NA	NA	NA	NA	30418433	NA
4	CASSSANYGYTF	HC2	TRBV12-4,12-3	TRBJ1-2	0.088	Giudice et al., 2018	0	CAAPRETSYDKVIF	CASSSANYGYTF	Human	Pathogens	Cytomegalovirus (CMV)	D003586	NA	1	Yes	NA	pp65	P06725	NLVPMVATV	44921	HLA-A2	NA	NA	NA	NA	NA	NA	TRBV12-3,12-4	NA	NA	NA	NA	NA	30418433	NA
4	CASSSANYGYTF	HC2	TRBV12-4,12-3	TRBJ1-2	0.088	Giudice et al., 2018	0	CAAPRETSYDKVIF	CASSSANYGYTF	Human	Pathogens	Cytomegalovirus (CMV)	D003586	NA	1	Yes	NA	pp65	P06725	NLVPMVATV	44921	HLA-A2	NA	NA	NA	NA	NA	NA	TRBV12-3,12-4	NA	NA	NA	NA	NA	30418433	NA
4	CASSSANYGYTF	HC2	TRBV12-4,12-3	TRBJ1-2	0.088	Giudice et al., 2018	0	CAGPTKTSYDKVIF	CASSSANYGYTF	Human	Pathogens	Cytomegalovirus (CMV)	D003586	NA	1	Yes	NA	pp65	P06725	NLVPMVATV	44921	HLA-A2	NA	NA	NA	NA	TRAV12-2	NA	TRBV12-3,12-4	NA	NA	NA	NA	NA	30418433	NA
4	CASSSANYGYTF	HC2	TRBV12-4,12-3	TRBJ1-2	0.088	Giudice et al., 2018	0	CAAPRETSYDKVIF	CASSSANYGYTF	Human	Pathogens	Cytomegalovirus (CMV)	D003586	NA	1	Yes	NA	pp65	P06725	NLVPMVATV	44921	HLA-A2	NA	NA	NA	NA	NA	NA	TRBV12-3,12-4	NA	NA	NA	NA	NA	30418433	NA
4	CASSSANYGYTF	HC2	TRBV12-4,12-3	TRBJ1-2	0.088	Giudice et al., 2018	0	CAAPRETSYDKVIF	CASSSANYGYTF	Human	Pathogens	Cytomegalovirus (CMV)	D003586	NA	1	Yes	NA	pp65	P06725	NLVPMVATV	44921	HLA-A2	NA	NA	NA	NA	NA	NA	TRBV12-3,12-4	NA	NA	NA	NA	NA	30418433	NA
4	CASSSANYGYTF	HC2	TRBV12-4,12-3	TRBJ1-2	0.088	Giudice et al., 2018	0	CAAPRETSYDKVIF	CASSSANYGYTF	Human	Pathogens	Cytomegalovirus (CMV)	D003586	NA	1	Yes	NA	pp65	P06725	NLVPMVATV	44921	HLA-A2	NA	NA	NA	NA	TRAV12-2	NA	TRBV12-3,12-4	NA	NA	NA	NA	NA	30418433	NA
4	CASSSANYGYTF	HC2	TRBV12-4,12-3	TRBJ1-2	0.088	Giudice et al., 2018	0	NA	CASSSANYGYTF	Human	Pathogens	Cytomegalovirus (CMV)	D003586	NA	1	Yes	NA	pp65	P06725	NLVPMVATV	44921	HLA-A2	NA	NA	NA	NA	TRAV23/DV6	NA	TRBV12-3,12-4	NA	NA	NA	NA	NA	30418433	NA
4	CASSSANYGYTF	HC2	TRBV12-4,12-3	TRBJ1-2	0.088	Giudice et al., 2018	0	NA	CASSSANYGYTF	Human	Pathogens	Cytomegalovirus (CMV)	D003586	NA	1	Yes	NA	pp65	P06725	NLVPMVATV	44921	HLA-A2	NA	NA	NA	NA	TRAV13-2	NA	TRBV12-3,12-4	NA	NA	NA	NA	NA	30418433	NA
4	CASSSANYGYTF	HC2	TRBV12-4,12-3	TRBJ1-2	0.088	Giudice et al., 2018	0	CAAPRETSYDKVIF	CASSSANYGYTF	Human	Pathogens	Cytomegalovirus (CMV)	D003586	NA	1	Yes	NA	pp65	P06725	NLVPMVATV	44921	HLA-A2	NA	NA	NA	NA	TRAV12-2	NA	TRBV12-3,12-4	NA	NA	NA	NA	NA	30418433	NA
4	CASSSANYGYTF	HC2	TRBV12-4,12-3	TRBJ1-2	0.088	Giudice et al., 2018	0	CAAPRETSYDKVIF	CASSSANYGYTF	Human	Pathogens	Cytomegalovirus (CMV)	D003586	NA	1	Yes	NA	pp65	P06725	NLVPMVATV	44921	HLA-A2	NA	NA	NA	NA	NA	NA	TRBV12-3,12-4	NA	NA	NA	NA	NA	30418433	NA
4	CASSSANYGYTF	HC2	TRBV12-4,12-3	TRBJ1-2	0.088	Giudice et al., 2018	0	CAAPRETSYDKVIF	CASSSANYGYTF	Human	Pathogens	Cytomegalovirus (CMV)	D003586	NA	1	Yes	NA	pp65	P06725	NLVPMVATV	44921	HLA-A2	NA	NA	NA	NA	TRAV41	NA	TRBV12-3,12-4	NA	NA	NA	NA	NA	30418433	NA
4	CASSSANYGYTF	HC2	TRBV12-4,12-3	TRBJ1-2	0.088	Giudice et al., 2018	0	CAAPRETSYDKVIF	CASSSANYGYTF	Human	Pathogens	Cytomegalovirus (CMV)	D003586	NA	1	Yes	NA	pp65	P06725	NLVPMVATV	44921	HLA-A2	NA	NA	NA	NA	TRAV12-2	NA	TRBV12-3,12-4	NA	NA	NA	NA	NA	30418433	NA
4	CASSSANYGYTF	HC2	TRBV12-4,12-3	TRBJ1-2	0.088	Giudice et al., 2018	0	CAAPRETSYDKVIF	CASSSANYGYTF	Human	Pathogens	Cytomegalovirus (CMV)	D003586	NA	1	Yes	NA	pp65	P06725	NLVPMVATV	44921	HLA-A2	NA	NA	NA	NA	NA	NA	TRBV12-3,12-4	NA	NA	NA	NA	NA	30418433	NA
4	CASSSANYGYTF	HC2	TRBV12-4,12-3	TRBJ1-2	0.088	Giudice et al., 2018	0	CAAPRETSYDKVIF	CASSSANYGYTF	Human	Pathogens	Cytomegalovirus (CMV)	D003586	NA	1	Yes	NA	pp65	P06725	NLVPMVATV	44921	HLA-A2	NA	NA	NA	NA	NA	NA	TRBV12-3,12-4	NA	NA	NA	NA	NA	30418433	NA
4	CASSSANYGYTF	HC2	TRBV12-4,12-3	TRBJ1-2	0.088	Giudice et al., 2018	0	CAGPTKTSYDKVIF	CASSSANYGYTF	Human	Pathogens	Cytomegalovirus (CMV)	D003586	NA	1	Yes	NA	pp65	P06725	NLVPMVATV	44921	HLA-A2	NA	NA	NA	NA	NA	NA	TRBV12-3,12-4	NA	NA	NA	NA	NA	30418433	NA
4	CASSSANYGYTF	HC2	TRBV12-4,12-3	TRBJ1-2	0.088	Giudice et al., 2018	0	CAAPRETSYDKVIF	CASSSANYGYTF	Human	Pathogens	Cytomegalovirus (CMV)	D003586	NA	1	Yes	NA	pp65	P06725	NLVPMVATV	44921	HLA-A2	NA	NA	NA	NA	NA	NA	TRBV12-3,12-4	NA	NA	NA	NA	NA	30418433	NA
4	CASSSANYGYTF	HC2	TRBV12-4,12-3	TRBJ1-2	0.088	Giudice et al., 2018	0	CAAPRETSYDKVIF	CASSSANYGYTF	Human	Pathogens	Cytomegalovirus (CMV)	D003586	NA	1	Yes	NA	pp65	P06725	NLVPMVATV	44921	HLA-A2	NA	NA	NA	NA	TRAV12-1	NA	TRBV12-3,12-4	NA	NA	NA	NA	NA	30418433	NA
4	CASSSANYGYTF	HC2	TRBV12-4,12-3	TRBJ1-2	0.088	Giudice et al., 2018	0	CAAPRETSYDKVIF	CASSSANYGYTF	Human	Pathogens	Cytomegalovirus (CMV)	D003586	NA	1	Yes	NA	pp65	P06725	NLVPMVATV	44921	HLA-A2	NA	NA	NA	NA	NA	NA	TRBV12-3,12-4	NA	NA	NA	NA	NA	30418433	NA
4	CASSSANYGYTF	HC2	TRBV12-4,12-3	TRBJ1-2	0.088	Giudice et al., 2018	0	NA	CASSSANYGYTF	Human	Pathogens	Cytomegalovirus (CMV)	D003586	NA	1	Yes	NA	pp65	P06725	NLVPMVATV	44921	HLA-A2	NA	NA	NA	NA	NA	NA	TRBV12-3,12-4	NA	NA	NA	NA	NA	30418433	NA
4	CASSSANYGYTF	HC2	TRBV12-4,12-3	TRBJ1-2	0.088	Giudice et al., 2018	0	CAAPRETSYDKVIF	CASSSANYGYTF	Human	Pathogens	Cytomegalovirus (CMV)	D003586	NA	1	Yes	NA	pp65	P06725	NLVPMVATV	44921	HLA-A2	NA	NA	NA	NA	NA	NA	TRBV12-3,12-4	NA	NA	NA	NA	NA	30418433	NA
4	CASSSANYGYTF	HC2	TRBV12-4,12-3	TRBJ1-2	0.088	Giudice et al., 2018	0	CAAPRETSYDKVIF	CASSSANYGYTF	Human	Pathogens	Cytomegalovirus (CMV)	D003586	NA	1	Yes	NA	pp65	P06725	NLVPMVATV	44921	HLA-A2	NA	NA	NA	NA	TRAV12-1	NA	TRBV12-3,12-4	NA	NA	NA	NA	NA	30418433	NA
4	CASSSANYGYTF	HC2	TRBV12-4,12-3	TRBJ1-2	0.088	Giudice et al., 2018	0	CAAPRETSYDKVIF	CASSSANYGYTF	Human	Pathogens	Cytomegalovirus (CMV)	D003586	NA	1	Yes	NA	pp65	P06725	NLVPMVATV	44921	HLA-A2	NA	NA	NA	NA	NA	NA	TRBV12-3,12-4	NA	NA	NA	NA	NA	30418433	NA
4	CASSSANYGYTF	HC2	TRBV12-4,12-3	TRBJ1-2	0.088	Giudice et al., 2018	0	NA	CASSSANYGYTF	Human	Pathogens	Cytomegalovirus (CMV)	D003586	NA	1	Yes	NA	pp65	P06725	NLVPMVATV	44921	HLA-A2	NA	NA	NA	NA	NA	NA	TRBV12-3,12-4	NA	NA	NA	NA	NA	30418433	NA
4	CASSSANYGYTF	HC2	TRBV12-4,12-3	TRBJ1-2	0.088	Giudice et al., 2018	0	NA	CASSSANYGYTF	Human	Pathogens	Cytomegalovirus (CMV)	D003586	NA	1	Yes	NA	pp65	P06725	NLVPMVATV	44921	HLA-A2	NA	NA	NA	NA	TRAV38-2/DV8	NA	TRBV12-3,12-4	NA	NA	NA	NA	NA	30418433	NA
4	CASSSANYGYTF	HC2	TRBV12-4,12-3	TRBJ1-2	0.088	Giudice et al., 2018	0	CAAPRETSYDKVIF	CASSSANYGYTF	Human	Pathogens	Cytomegalovirus (CMV)	D003586	NA	1	Yes	NA	pp65	P06725	NLVPMVATV	44921	HLA-A2	NA	NA	NA	NA	NA	NA	TRBV12-3,12-4	NA	NA	NA	NA	NA	30418433	NA
4	CASSSANYGYTF	HC2	TRBV12-4,12-3	TRBJ1-2	0.088	Giudice et al., 2018	0	CAAPRETSYDKVIF	CASSSANYGYTF	Human	Pathogens	Cytomegalovirus (CMV)	D003586	NA	1	Yes	NA	pp65	P06725	NLVPMVATV	44921	HLA-A2	NA	NA	NA	NA	TRAV8-3	NA	TRBV12-3,12-4	NA	NA	NA	NA	NA	30418433	NA
4	CASSSANYGYTF	HC2	TRBV12-4,12-3	TRBJ1-2	0.088	Giudice et al., 2018	0	CAAPRETSYDKVIF	CASSSANYGYTF	Human	Pathogens	Cytomegalovirus (CMV)	D003586	NA	1	Yes	NA	pp65	P06725	NLVPMVATV	44921	HLA-A2	NA	NA	NA	NA	NA	NA	TRBV12-3,12-4	NA	NA	NA	NA	NA	30418433	NA
4	CASSSANYGYTF	HC2	TRBV12-4,12-3	TRBJ1-2	0.088	Giudice et al., 2018	0	CAAPRETSYDKVIF	CASSSANYGYTF	Human	Pathogens	Cytomegalovirus (CMV)	D003586	NA	1	Yes	NA	pp65	P06725	NLVPMVATV	44921	HLA-A2	NA	NA	NA	NA	TRAV12-2	NA	TRBV12-3,12-4	NA	NA	NA	NA	NA	30418433	NA
4	CASSSANYGYTF	HC2	TRBV12-4,12-3	TRBJ1-2	0.088	Giudice et al., 2018	0	CAAPRETSYDKVIF	CASSSANYGYTF	Human	Pathogens	Cytomegalovirus (CMV)	D003586	NA	1	Yes	NA	pp65	P06725	NLVPMVATV	44921	HLA-A2	NA	NA	NA	NA	NA	NA	TRBV12-3,12-4	NA	NA	NA	NA	NA	30418433	NA
4	CASSSANYGYTF	HC2	TRBV12-4,12-3	TRBJ1-2	0.088	Giudice et al., 2018	0	NA	CASSSANYGYTF	Human	Pathogens	Cytomegalovirus (CMV)	D003586	NA	1	Yes	NA	pp65	P06725	NLVPMVATV	44921	HLA-A2	NA	NA	NA	NA	NA	NA	TRBV12-3,12-4	NA	NA	NA	NA	NA	30418433	NA
4	CASSSANYGYTF	HC2	TRBV12-4,12-3	TRBJ1-2	0.088	Giudice et al., 2018	0	CAAPRETSYDKVIF	CASSSANYGYTF	Human	Pathogens	Cytomegalovirus (CMV)	D003586	NA	1	Yes	NA	pp65	P06725	NLVPMVATV	44921	HLA-A2	NA	NA	NA	NA	TRAV8-1	NA	TRBV12-3,12-4	NA	NA	NA	NA	NA	30418433	NA
4	CASSSANYGYTF	HC2	TRBV12-4,12-3	TRBJ1-2	0.088	Giudice et al., 2018	0	CAAPRETSYDKVIF	CASSSANYGYTF	Human	Pathogens	Cytomegalovirus (CMV)	D003586	NA	1	Yes	NA	pp65	P06725	NLVPMVATV	44921	HLA-A2	NA	NA	NA	NA	TRAV12-2	NA	TRBV12-3,12-4	NA	NA	NA	NA	NA	30418433	NA
4	CASSSANYGYTF	HC2	TRBV12-4,12-3	TRBJ1-2	0.088	Giudice et al., 2018	0	CAAPRETSYDKVIF	CASSSANYGYTF	Human	Pathogens	Cytomegalovirus (CMV)	D003586	NA	1	Yes	NA	pp65	P06725	NLVPMVATV	44921	HLA-A2	NA	NA	NA	NA	NA	NA	TRBV12-3,12-4	NA	NA	NA	NA	NA	30418433	NA
4	CASSSANYGYTF	HC2	TRBV12-4,12-3	TRBJ1-2	0.088	Giudice et al., 2018	0	CAAPRETSYDKVIF	CASSSANYGYTF	Human	Pathogens	Cytomegalovirus (CMV)	D003586	NA	1	Yes	NA	pp65	P06725	NLVPMVATV	44921	HLA-A2	NA	NA	NA	NA	TRAV12-2	NA	TRBV12-3,12-4	NA	NA	NA	NA	NA	30418433	NA
4	CASSSANYGYTF	HC2	TRBV12-4,12-3	TRBJ1-2	0.088	Giudice et al., 2018	0	CAAPRETSYDKVIF	CASSSANYGYTF	Human	Pathogens	Cytomegalovirus (CMV)	D003586	NA	1	Yes	NA	pp65	P06725	NLVPMVATV	44921	HLA-A2	NA	NA	NA	NA	TRAV12-1	NA	TRBV12-3,12-4	NA	NA	NA	NA	NA	30418433	NA
4	CASSSANYGYTF	HC2	TRBV12-4,12-3	TRBJ1-2	0.088	Giudice et al., 2018	0	CAGPMKTSYDKVIF	CASSSANYGYTF	Human	Pathogens	Cytomegalovirus (CMV)	D003586	NA	1	Yes	NA	pp65	P06725	NLVPMVATV	44921	HLA-A2	NA	NA	NA	NA	NA	NA	TRBV12-3,12-4	NA	NA	NA	NA	NA	30418433	NA
4	CASSSANYGYTF	HC2	TRBV12-4,12-3	TRBJ1-2	0.088	Giudice et al., 2018	0	NA	CASSSANYGYTF	Human	Pathogens	Cytomegalovirus (CMV)	D003586	NA	1	Yes	NA	pp65	P06725	NLVPMVATV	44921	HLA-A2	NA	NA	NA	NA	NA	NA	TRBV12-3,12-4	NA	NA	NA	NA	NA	30418433	NA
4	CASSSANYGYTF	HC2	TRBV12-4,12-3	TRBJ1-2	0.088	Giudice et al., 2018	0	CAGPMKTSYDKVIF	CASSSANYGYTF	Human	Pathogens	Cytomegalovirus (CMV)	D003586	NA	1	Yes	NA	pp65	P06725	NLVPMVATV	44921	HLA-A2	NA	NA	NA	NA	NA	NA	TRBV12-3,12-4	NA	NA	NA	NA	NA	30418433	NA
4	CASSSANYGYTF	HC2	TRBV12-4,12-3	TRBJ1-2	0.088	Giudice et al., 2018	0	NA	CASSSANYGYTF	Human	Pathogens	Cytomegalovirus (CMV)	D003586	NA	1	Yes	NA	pp65	P06725	NLVPMVATV	44921	HLA-A2	NA	NA	NA	NA	NA	NA	TRBV12-3,12-4	NA	NA	NA	NA	NA	30418433	NA
4	CASSSANYGYTF	HC2	TRBV12-4,12-3	TRBJ1-2	0.088	Giudice et al., 2018	0	CAGPMKTSYDKVIF	CASSSANYGYTF	Human	Pathogens	Cytomegalovirus (CMV)	D003586	NA	1	Yes	NA	pp65	P06725	NLVPMVATV	44921	HLA-A2	NA	NA	NA	NA	NA	NA	TRBV12-3,12-4	NA	NA	NA	NA	NA	30418433	NA
4	CASSSANYGYTF	HC2	TRBV12-4,12-3	TRBJ1-2	0.088	Giudice et al., 2018	0	NA	CASSSANYGYTF	Human	Pathogens	Cytomegalovirus (CMV)	D003586	NA	1	Yes	NA	pp65	P06725	NLVPMVATV	44921	HLA-A2	NA	NA	NA	NA	NA	NA	TRBV12-3,12-4	NA	NA	NA	NA	NA	30418433	NA
4	CASSSANYGYTF	HC2	TRBV12-4,12-3	TRBJ1-2	0.088	Giudice et al., 2018	1	NA	CASSEANYGYTF	Human	Pathogens	M.Tuberculosis	D009169	Bulk	22	No	Yes	NA	NA	NA	NA	NA	PBMC	CD4	NA	NA	NA	NA	TRBV6-1	NA	NA	NA	NA	NA	32341563	NA
8	CSVEGGSSYEQYF	HC3	TRBV29-1	TRBJ2-7	0.045	Giudice et al., 2018	1	NA	CSVEGGTSSYEQYF	Human	Cancer	Melanoma	D008613	NA	3	No	No	mutated CDKNA2	NA	NA	NA	HLA-A*11:01	Skin	CD8	TIL, PD-1+	NA	NA	NA	TRBV29-01	TRBD2	TRBJ2-7	No	NA	NA	24667641	NA
15	CSAIPTGTYEQYF	HC5	TRBV20-1	TRBJ2-7	0.019	Giudice et al., 2018	1	NA	CSAIPTGNYEQYF	Human	Pathogens	Influenza	D009980	NA	1	Yes	Yes	Matrix protein (M1)	P03485	GILGFVFTL	20354	HLA-A2	PBMC	CD8	NA	NA	NA	NA	TRBV20-1	NA	TRBJ2-7	No	NA	NA	28423320	NA
17	CASTIDGELFF	HC6	TRBV10-1	TRBJ2-2	0.19	Giudice et al., 2018	1	NA	CASTITGELFF	Human	Pathogens	Influenza	D009980	NA	1	No	Yes	NP177	P03466	LPRRSGAAGA	38688	HLA-B7	PBMC	CD8	NA	NA	NA	NA	TRBV7-6	NA	TRBJ2-2	No	TGTGCCAGCACCATTACCGGGGAGCTGTTTTTT	NA	28636589	NA
22	CASSIVGRGDTEAFF	HC8	TRBV19	TRBJ1-1	0.02	Giudice et al., 2018	1	CAMRSSDPGGYNKLIF	CASSIQGRGDTEAFF	Human	Pathogens	Yellow fever virus	D015005	NA	1	Yes	NA	YFV-LLW	P29165	LLWNGPMAV	121572	HLA-A2	NA	NA	NA	NA	NA	NA	TRBV19	NA	NA	NA	NA	NA	30418433	NA
25	CASSLGETQYF	HC9	TRBV7-6	TRBJ2-5	0.056	Giudice et al., 2018	1	NA	CASSLETQYF	Human	Autoimmune	Diabetes Type 1	D004015	NA	3	No	No	insulin precursor A1-15	NA	NA	NA	NA	Spleen	NA	NA	NA	NA	NA	TRBV5-01	NA	TRBJ2-5	No	NA	NA	15889096	NA
25	CASSLGETQYF	HC9	TRBV7-6	TRBJ2-5	0.056	Giudice et al., 2018	1	NA	CASSLGDTQYF	Human	Autoimmune	Diabetes Type 1	D004046	NA	3	No	No	insulin precursor A1-15	NA	NA	NA	NA	Spleen	NA	NA	NA	NA	NA	TRBV5-01	NA	TRBJ2-3	No	NA	NA	15889096	NA
25	CASSLGETQYF	HC9	TRBV7-6	TRBJ2-5	0.056	Giudice et al., 2018	0	NA	CASSLGETQYF	Human	Allergy	Allergy	D063926	Drug reaction with eosinophilia and systemic symptoms	3	No	No	NA	NA	NA	NA	NA	PBMC	CD8	NA	NA	NA	NA	NA	NA	TRBJ2-5	No	NA	NA	25905582	NA
25	CASSLGETQYF	HC9	TRBV7-6	TRBJ2-5	0.056	Giudice et al., 2018	1	CVLGVYGSSGNKLIF	CASSLGDTQYF	Mouse	Pathogens	mCMV	D018146	NA	1	Yes	Yes	M38	A8E1G4	SSPPMFRV	61280	H-2Kb	Spleen	CD8	NA	NA	TRAV6-1:01	TRAJ3-01	TRBV1-01	NA	TRBJ2-5:01	No	NA	C57/BL6	28636592	NA
25	CASSLGETQYF	HC9	TRBV7-6	TRBJ2-5	0.056	Giudice et al., 2018	1	NA	CASRLGETQYF	Human	Pathogens	Epstein Barr virus (EBV)	D020031	NA	1	No	Yes	BMLF-1	Q04360	GLCTLVAML	20788	HLA-A2	PBMC	CD8	NA	NA	NA	NA	TRBV6-2	NA	TRBJ2-5	No	TGTGCCAGCAGGCTGGGGGAGACCCAGTACTTC	NA	28636589	NA
25	CASSLGETQYF	HC9	TRBV7-6	TRBJ2-5	0.056	Giudice et al., 2018	1	NA	CASSLEGETQYF	Human	Pathogens	Influenza	D009980	NA	1	No	Yes	Matrix protein (M1)	P03485	GILGFVFTL	20354	HLA-A2	PBMC	CD8	NA	NA	NA	NA	TRBV7-2	NA	TRBJ2-5	No	TGTGCCAGCAGCTTAGAGGGGGAGACCCAGTACTTC	NA	28636589	NA
25	CASSLGETQYF	HC9	TRBV7-6	TRBJ2-5	0.056	Giudice et al., 2018	1	NA	CASSLGRETQYF	Human	Pathogens	Influenza	D009980	NA	1	No	Yes	NP177	P03466	LPRRSGAAGA	38688	HLA-B7	PBMC	CD8	NA	NA	NA	NA	TRBV28	NA	TRBJ2-5	No	TGTGCCAGCAGTCTCGGACGGGAGACCCAGTACTTC	NA	28636589	NA
25	CASSLGETQYF	HC9	TRBV7-6	TRBJ2-5	0.056	Giudice et al., 2018	0	NA	CASSLGETQYF	Human	Pathogens	Influenza	D009980	NA	1	No	Yes	NP177	P03466	LPRRSGAAGA	38688	HLA-B7	PBMC	CD8	NA	NA	NA	NA	TRBV4-1	NA	TRBJ2-5	No	TGCGCCAGCAGCCTCGGGGAGACCCAGTACTTC	NA	28636589	NA
25	CASSLGETQYF	HC9	TRBV7-6	TRBJ2-5	0.056	Giudice et al., 2018	1	NA	CASSRGETQYF	Human	Pathogens	Influenza	D009980	NA	1	No	Yes	NP177	P03466	LPRRSGAAGA	38688	HLA-B7	PBMC	CD8	NA	NA	NA	NA	TRBV4-3	NA	TRBJ2-5	No	TGCGCCAGCAGCCGAGGGGAGACCCAGTACTTC	NA	28636589	NA
25	CASSLGETQYF	HC9	TRBV7-6	TRBJ2-5	0.056	Giudice et al., 2018	1	CIEHTNSGGSNYKLTF	CASSLEETQYF	Human	Pathogens	M. tuberculosis	D009169	NA	21	No	Yes	CFP10	P9WNK5	TAAQAAVVRFQEAAN	62799	DRB1*15:03	PBMC	CD4	NA	NA	NA	NA	NA	NA	TRBJ2-5	No	NA	NA	28636589	Reconstruted J
25	CASSLGETQYF	HC9	TRBV7-6	TRBJ2-5	0.056	Giudice et al., 2018	1	NA	CASSLEETQYF	Human	Autoimmune	Celiac disease	D002446	NA	22	No	Yes	NA	NA	NA	NA	NA	PBMC	CD4	NA	NA	NA	NA	TRBV2-1	NA	NA	No	NA	NA	29269859	NA
25	CASSLGETQYF	HC9	TRBV7-6	TRBJ2-5	0.056	Giudice et al., 2018	1	NA	CASSLGDTQYF	Human	Autoimmune	Celiac disease	D002446	NA	22	No	Yes	NA	NA	NA	NA	NA	PBMC	CD4	NA	NA	NA	NA	TRBV7-2	NA	NA	No	NA	NA	29269859	NA
25	CASSLGETQYF	HC9	TRBV7-6	TRBJ2-5	0.056	Giudice et al., 2018	1	NA	CASSLEGETQYF	Human	Pathogens	Cytomegalovirus (CMV)	D003586	NA	1	Yes	Yes	pp65	P06725	NLVPMVATV	44920	HLA-A2	PBMC	CD8	NA	NA	NA	NA	TRBV20-1	NA	TRBJ1-2	No	NA	NA	28423320	NA
25	CASSLGETQYF	HC9	TRBV7-6	TRBJ2-5	0.056	Giudice et al., 2018	1	NA	CASSLQETQYF	Human	Autoimmune	Inflammatory bowel disease (IBD)	D015212	Chrohn's disease and Ulceritive colitis	22	No	Yes	Flagellin	P22251	NA	NA	NA	PBMC	CD4	NA	NA	NA	NA	TRBV6-9	NA	TRBJ2-5	No	NA	NA	29988119	NA
25	CASSLGETQYF	HC9	TRBV7-6	TRBJ2-5	0.056	Giudice et al., 2018	1	NA	CASSLEETQYF	Human	Autoimmune	Inflammatory bowel disease (IBD)	D015212	Chrohn's disease and Ulceritive colitis	22	No	Yes	Flagellin	P22251	NA	NA	NA	PBMC	CD4	NA	NA	NA	NA	TRBV7-8	NA	TRBJ2-5	No	NA	NA	29988119	NA
25	CASSLGETQYF	HC9	TRBV7-6	TRBJ2-5	0.056	Giudice et al., 2018	1	NA	CASSLRETQYF	Human	Autoimmune	Inflammatory bowel disease (IBD)	D015212	Chrohn's disease and Ulceritive colitis	22	No	Yes	Flagellin	P22251	NA	NA	NA	PBMC	CD4	NA	NA	NA	NA	TRBV11-3	NA	TRBJ2-5	No	NA	NA	29988119	NA
25	CASSLGETQYF	HC9	TRBV7-6	TRBJ2-5	0.056	Giudice et al., 2018	1	NA	CASSLGRETQYF	Human	Pathogens	Cytomegalovirus (CMV)	D003586	NA	1	No	Yes	IE-1	P03169	CRVLCCYVL	6954	HLA-C*07:02	PBMC	CD8	NA	NA	NA	NA	TRBV28	NA	TRBJ2-5	NA	NA	NA	30587531	NA
25	CASSLGETQYF	HC9	TRBV7-6	TRBJ2-5	0.056	Giudice et al., 2018	1	CVVSDRGSTLGRLYF	CASSEGETQYF	Human	Pathogens	M. tuberculosis	D009169	NA	22	Yes	Yes	NA	NA	NA	NA	NA	PBMC	CD8	iNKT	NA	NA	TRAJ18	TRBV25-1	NA	TRBJ2-5	NA	NA	NA	30992377	NA
25	CASSLGETQYF	HC9	TRBV7-6	TRBJ2-5	0.056	Giudice et al., 2018	1	NA	CASSLGTQYF	Human	Cancer	Merkel cell carcinoma	D015266	NA	1	No	Yes	LTAg	U6C645	WEDLFCDESLSSPEPPSSSE	NA	DRB1*04-01	Skin tumor	CD4	TIL	TGTGCCAGCAGCTTGGGTACGCAGTATTTT	NA	NA	TRBV13-1*01	NA	TRBJ2-3*01	NA	NA	NA	31405946	NA
25	CASSLGETQYF	HC9	TRBV7-6	TRBJ2-5	0.056	Giudice et al., 2018	0	NA	CASSLGETQYF	Human	Pathogens	M.Tuberculosis	D009169	Bulk	22	No	Yes	NA	NA	NA	NA	NA	PBMC	CD4	NA	NA	NA	NA	TRBV7-9	NA	NA	NA	NA	NA	32341563	NA
25	CASSLGETQYF	HC9	TRBV7-6	TRBJ2-5	0.056	Giudice et al., 2018	1	NA	CASSLGVETQYF	Human	Pathogens	M.Tuberculosis	D009169	Bulk	22	No	Yes	NA	NA	NA	NA	NA	PBMC	CD4	NA	NA	NA	NA	TRBV5-1	NA	NA	NA	NA	NA	32341563	NA
25	CASSLGETQYF	HC9	TRBV7-6	TRBJ2-5	0.056	Giudice et al., 2018	1	NA	CASSEGETQYF	Human	Pathogens	M.Tuberculosis	D009169	Bulk	22	No	Yes	NA	NA	NA	NA	NA	PBMC	CD4	NA	NA	NA	NA	TRBV25-1	NA	NA	NA	NA	NA	32341563	NA
